# Supplementary material for: An enquiry based on a standardised questionnaire into knowledge, awareness and preferences concerning the care of familial hypercholesterolaemia among primary care physicians in the Asia-Pacific region: the “Ten Countries Study”
Source: PubMed Central journal article supplement — BMJ Open. 2017 Oct 25;7(10):e017817. doi: 10.1136/bmjopen-2017-017817 (PMC5665281; doi:10.1136/bmjopen-2017-017817), 2017-10-25
Supplement: bmjopen-2017-017817.draft_revisions.pdf [file bmjopen-2017-017817.draft_revisions.pdf]

# BMJ Open

BMJ Open is committed to open peer review. As part of this commitment we make the peer review history of every article we publish publicly available.

When an article is published we post the peer reviewers' comments and the authors' responses online. We also post the versions of the paper that were used during peer review. These are the versions that the peer review comments apply to.

The versions of the paper that follow are the versions that were submitted during the peer review process. They are not the versions of record or the final published versions. They should not be cited or distributed as the published version of this manuscript.

BMJ Open is an open access journal and the full, final, typeset and author-corrected version of record of the manuscript is available on our site with no access controls, subscription charges or pay-per-view fees (<http://bmjopen.bmj.com>).

If you have any questions on BMJ Open's open peer review process please email [editorial.bmjopen@bmj.com](mailto:editorial.bmjopen@bmj.com)

# BMJ Open

## Primary Care Physicians' Knowledge, Awareness and Preferences regarding the care of Familial Hypercholesterolemia in the Asia-Pacific region: The "Ten Countries Study"

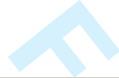

|                               |                                                                                                                                                                                                                                                                                                                                                                                                                                                                                                                                                                                                                                                                                                                                                                                                                                                                                                                                                                                                                                                                                                                                                                                                                                                                                                                                                                                                                                                                                                                                                                                                                                                                                                                                                                                                                                                                                                                                                                                                                                                                                                                                                                                                                                                                                                                                                                                                              |
|-------------------------------|--------------------------------------------------------------------------------------------------------------------------------------------------------------------------------------------------------------------------------------------------------------------------------------------------------------------------------------------------------------------------------------------------------------------------------------------------------------------------------------------------------------------------------------------------------------------------------------------------------------------------------------------------------------------------------------------------------------------------------------------------------------------------------------------------------------------------------------------------------------------------------------------------------------------------------------------------------------------------------------------------------------------------------------------------------------------------------------------------------------------------------------------------------------------------------------------------------------------------------------------------------------------------------------------------------------------------------------------------------------------------------------------------------------------------------------------------------------------------------------------------------------------------------------------------------------------------------------------------------------------------------------------------------------------------------------------------------------------------------------------------------------------------------------------------------------------------------------------------------------------------------------------------------------------------------------------------------------------------------------------------------------------------------------------------------------------------------------------------------------------------------------------------------------------------------------------------------------------------------------------------------------------------------------------------------------------------------------------------------------------------------------------------------------|
| Journal:                      | <i>BMJ Open</i>                                                                                                                                                                                                                                                                                                                                                                                                                                                                                                                                                                                                                                                                                                                                                                                                                                                                                                                                                                                                                                                                                                                                                                                                                                                                                                                                                                                                                                                                                                                                                                                                                                                                                                                                                                                                                                                                                                                                                                                                                                                                                                                                                                                                                                                                                                                                                                                              |
| Manuscript ID                 | bmjopen-2017-017817                                                                                                                                                                                                                                                                                                                                                                                                                                                                                                                                                                                                                                                                                                                                                                                                                                                                                                                                                                                                                                                                                                                                                                                                                                                                                                                                                                                                                                                                                                                                                                                                                                                                                                                                                                                                                                                                                                                                                                                                                                                                                                                                                                                                                                                                                                                                                                                          |
| Article Type:                 | Research                                                                                                                                                                                                                                                                                                                                                                                                                                                                                                                                                                                                                                                                                                                                                                                                                                                                                                                                                                                                                                                                                                                                                                                                                                                                                                                                                                                                                                                                                                                                                                                                                                                                                                                                                                                                                                                                                                                                                                                                                                                                                                                                                                                                                                                                                                                                                                                                     |
| Date Submitted by the Author: | 19-May-2017                                                                                                                                                                                                                                                                                                                                                                                                                                                                                                                                                                                                                                                                                                                                                                                                                                                                                                                                                                                                                                                                                                                                                                                                                                                                                                                                                                                                                                                                                                                                                                                                                                                                                                                                                                                                                                                                                                                                                                                                                                                                                                                                                                                                                                                                                                                                                                                                  |
| Complete List of Authors:     | <p>Pang, Jing; University of Western Australia, School of Medicine, Faculty of Health and Medical Sciences</p> <p>Hu, Miao; The Chinese University of Hong Kong, Department of Medicine and Therapeutics</p> <p>Lin, Jie; Beijing Anzhen Hospital, Capital Medical University - Beijing Institute of Heart, Lung and Blood Vessel Diseases</p> <p>Miida, Takashi; Juntendo University, Department of Clinical Laboratory Medicine, Graduate School of Medicine</p> <p>Nawawi, Hapizah; Universiti Teknologi MARA, Institute for Pathology, Laboratory and Forensic Medicine (I-PPerForM) and Disciplines of Chemical Pathology and Primary Care, Faculty of Medicine</p> <p>Park, Jeong Euy; Sungkyunkwan University School of Medicine, Division of Cardiology, Samsung Medical Center</p> <p>Wu, Xue; Beijing Anzhen Hospital, Capital Medical University - Beijing Institute of Heart, Lung and Blood Vessel Diseases</p> <p>Ramli, Anis Safura; Universiti Teknologi MARA, Institute for Pathology, Laboratory and Forensic Medicine (I-PPerForM) and Disciplines of Chemical Pathology and Primary Care, Faculty of Medicine</p> <p>Kim, Ngoc Thanh; Hanoi Medical University; Vietnam National Heart Institute, Bach Mai Hospital</p> <p>Kwok, See; University of Manchester, Institute of Human Development; The Old St Mary's Hospital, Cardiovascular Trials Unit, Central Manchester University Hospital NHS Foundation Trust</p> <p>Gonzales, Lourdes Ella; UP-Philippine General Hospital, Section of Preventive Cardiology, Department of Cardiology</p> <p>Su, Ta-Chen; National Taiwan University Hospital, Department of Internal Medicine and Cardiovascular Center</p> <p>Truong, Thanh Huong; Hanoi Medical University; Vietnam National Heart Institute, Bach Mai Hospital</p> <p>Soran, H; Cardiovascular Research Group, University of Manchester; Cardiovascular Trials Unit, Central Manchester University Hospitals</p> <p>Yamashita, Shizuya; Osaka University Graduate School of Medicine, Departments of Cardiovascular Medicine and Community; Rinku General Medical Center</p> <p>Tomlinson, Brian; The Chinese University of Hong Kong, Department of Medicine and Therapeutics</p> <p>Watts, Gerald; University of Western Australia, School of Medicine, Faculty of Health and Medical Sciences; Royal Perth Hospital, Lipid Disorders Clinic, Department of Cardiology</p> |

1  
2  
3  
4  
5  
6  
7  
8  
9  
10  
11  
12  
13  
14  
15  
16  
17  
18  
19  
20  
21  
22  
23  
24  
25  
26  
27  
28  
29  
30  
31  
32  
33  
34  
35  
36  
37  
38  
39  
40  
41  
42  
43  
44  
45  
46  
47  
48  
49  
50  
51  
52  
53  
54  
55  
56  
57  
58  
59  
60

|                                    |                                                                                           |
|------------------------------------|-------------------------------------------------------------------------------------------|
| <b>Primary Subject Heading</b> :   | Cardiovascular medicine                                                                   |
| <b>Secondary Subject Heading</b> : | Evidence based practice, Communication, Health services research, Public health           |
| <b>Keywords</b> :                  | familial hypercholesterolaemia, awareness, knowledge, practices, Asia-Pacific, physicians |
|                                    |                                                                                           |

SCHOLARONE™  
Manuscripts

For peer review only

1  
2  
3 1 **Primary Care Physicians' Knowledge, Awareness and Preferences regarding**  
4 2 **the care of Familial Hypercholesterolemia in the Asia-Pacific region:**  
5 3 **The "Ten Countries Study"**  
6 4

7 5 Jing Pang<sup>1</sup>, Miao Hu<sup>2</sup>, Jie Lin<sup>3</sup>, Takashi Miida<sup>4</sup>, Hapizah M Nawawi<sup>5</sup>, Jeong Euy  
8 6 Park<sup>6</sup>, Xue Wu<sup>3</sup>, Anis S Ramli<sup>5</sup>, Ngoc Thanh Kim<sup>7,8</sup>, See Kwok<sup>9,10</sup>, Lourdes E  
9 7 Gonzalez-Santos<sup>11</sup>, Ta-Chen Su<sup>12</sup>, Thanh Huong Truong<sup>7,8</sup>, Handrean Soran<sup>10</sup>,  
10 8 Shizuya Yamashita<sup>13,14</sup>, Brian Tomlinson<sup>2</sup> and Gerald F Watts<sup>1,15</sup>  
11 9

12 10 <sup>1</sup>School of Medicine, Faculty of Health and Medical Sciences, University of Western  
13 11 Australia, Perth, Western Australia, Australia

14 12 <sup>2</sup>Department of Medicine and Therapeutics, The Chinese University of Hong Kong,  
15 13 Shatin, Hong Kong SAR

16 14 <sup>3</sup>Department of Atherosclerosis, Beijing Anzhen Hospital, Capital Medical University  
17 15 - Beijing Institute of Heart, Lung and Blood Vessel Diseases, Beijing, China

18 16 <sup>4</sup>Department of Clinical Laboratory Medicine, Graduate School of Medicine,  
19 17 Juntendo University, Tokyo, Japan

20 18 <sup>5</sup>Institute for Pathology, Laboratory and Forensic Medicine (I-PPerForM) and  
21 19 Disciplines of Chemical Pathology and Primary Care, Faculty of Medicine, Universiti  
22 20 Teknologi MARA, Sungai Buloh, Selangor, Malaysia

23 21 <sup>6</sup>Division of Cardiology, Samsung Medical Center, Sungkyunkwan University School  
24 22 of Medicine, Seoul, South Korea

25 23 <sup>7</sup>Hanoi Medical University, Hanoi, Vietnam

26 24 <sup>8</sup>Vietnam National Heart Institute, Bach Mai Hospital, Hanoi, Vietnam.

27 25 <sup>9</sup>University of Manchester, Institute of Human Development, Manchester, United  
28 26 Kingdom

29 27 <sup>10</sup>Cardiovascular Trials Unit, The Old St Mary's Hospital, Central Manchester  
30 28 University Hospital NHS Foundation Trust, Manchester, United Kingdom

31 29 <sup>11</sup>Section of Preventive Cardiology, Department of Cardiology, UP-Philippine  
32 30 General Hospital, Manila, Philippines

33 31 <sup>12</sup>Department of Internal Medicine and Cardiovascular Center, National Taiwan  
34 32 University Hospital, Taipei, Taiwan

35 33 <sup>13</sup>Departments of Cardiovascular Medicine and Community Medicine, Osaka  
36 34 University Graduate School of Medicine, Osaka, Japan

37 35 <sup>14</sup>Rinku General Medical Center, Osaka, Japan

38 36 <sup>15</sup>Lipid Disorders Clinic, Department of Cardiology, Royal Perth Hospital, Perth,  
39 37 Western Australia, Australia  
40 38

41 39 **Word count:** 2,819; **Tables:** 2  
42 40

43 41 **Keywords:** familial hypercholesterolaemia, awareness, knowledge, practices,  
44 42 perception, Asia-Pacific, physicians, models of care  
45 43

46 44 **Corresponding author:**

47 45 Professor Gerald F Watts

48 46 Postal address: GPO Box X2213 Perth WA 6847 Australia

49 47 Phone: +61 8 9224 0245

50 48 Email: [gerald.watts@uwa.edu.au](mailto:gerald.watts@uwa.edu.au)  
51 52  
52 53  
53 54  
54 55  
55 56  
56 57  
57 58  
58 59  
59 60

1  
2  
3  
4  
5  
6  
7  
8  
9  
10  
11  
12  
13  
14  
15  
16  
17  
18  
19  
20  
21  
22  
23  
24  
25  
26  
27  
28  
29  
30  
31  
32  
33  
34  
35  
36  
37  
38  
39  
40  
41  
42  
43  
44  
45  
46  
47  
48  
49  
50  
51  
52  
53  
54  
55  
56  
57  
58  
59  
60

1 The Corresponding Author has the right to grant on behalf of all authors and does  
2 grant on behalf of all authors, an exclusive licence (or non-exclusive for government  
3 employees) on a worldwide basis to the BMJ Publishing Group Ltd to permit this  
4 article (if accepted) to be published in BMJ editions and any other BMJPGJL products  
5 and sublicences such use and exploit all subsidiary rights, as set out in our licence.

For peer review only

1  
2  
3 **1 ABSTRACT**

4  
5 **2 Objective:** To determine physicians' knowledge, awareness and preferences  
6  
7 regarding the care of familial hypercholesterolaemia (FH) in the Asia-Pacific region.  
8

9  
10 **4 Setting:** A formal questionnaire was anonymously completed by physicians from  
11  
12 different countries/regions in the Asia-Pacific. The survey sought responses relating  
13  
14 to general familiarity, awareness of management guidelines, identification (clinical  
15  
16 characteristics and lipid profile), prevalence and inheritance, extent of elevation in  
17  
18 risk of cardiovascular disease (CVD), and practice on screening and treatment.

19  
20 **9 Participants:** Practising community physicians from Australia, Japan, Malaysia,  
21  
22 South Korea, Philippines, Hong Kong, China, Vietnam and Taiwan were recruited to  
23  
24 complete the questionnaire, with the United Kingdom as the international  
25  
26 benchmark.

27  
28 **13 Primary outcome:** An assessment and comparison of the knowledge, awareness  
29  
30 and preferences of FH among physicians in ten different countries/regions.

31  
32 **15 Results:** 1,078 physicians completed the questionnaire from the Asia-Pacific region;  
33  
34 only 34% considered themselves to be familiar with FH. 72% correctly described FH  
35  
36 and 65% identified the typical lipid profile, with a higher proportion of physicians from  
37  
38 Japan and China selecting the correct FH definition and lipid profile compared with  
39  
40 those from Vietnam and Philippines. However, less than half of the physician were  
41  
42 aware of national or international management guidelines; this was significantly  
43  
44 worse than physicians from the United Kingdom (35% vs 61%,  $p < 0.001$ ). Knowledge  
45  
46 of prevalence (24%), inheritability (41%), and CVD risk (9%) of FH were also  
47  
48 suboptimal. The majority of the physicians considered laboratory interpretative  
49  
50 commenting as being useful (81%) and statin therapy as an appropriate cholesterol-  
51  
52 lowering therapy (89%) for FH management.

53  
54 **26 Conclusions:** The study identified important gaps, which are readily addressable, in  
55  
56 the awareness and knowledge of FH among physicians in the region.  
57  
58 Implementation of country-specific guidelines and extensive work in FH education  
59  
60 and awareness programs are imperative to improve the care of FH in the region.

1  
2  
3  
4  
5  
6  
7  
8  
9  
10  
11  
12  
13  
14  
15  
16  
17  
18  
19  
20  
21  
22  
23  
24  
25  
26  
27  
28  
29  
30  
31  
32  
33  
34  
35  
36  
37  
38  
39  
40  
41  
42  
43  
44  
45  
46  
47  
48  
49  
50  
51  
52  
53  
54  
55  
56  
57  
58  
59  
60

## 1 **Strengths and limitations of this study**

- 2 • The study is a large-scale multi-national survey assessing FH knowledge and  
3 management gaps across ten different countries/regions, with over 1000  
4 physicians completing the questionnaire
- 5 • Important deficits and gaps in knowledge and management of FH were  
6 identified in the region
- 7 • The self-selected group that responded to the questionnaire may reflect those  
8 with more interest and knowledge in lipid disorders, so that knowledge and  
9 management gaps may in reality be worse.
- 10 • Since the survey was conducted anonymously, there was no recorded  
11 information on non-responders.

12

## 1 INTRODUCTION

2 Familial hypercholesterolaemia (FH) is characterised by elevated low-density  
3 lipoprotein cholesterol (LDL-C) levels owing to mutations in the low-density  
4 lipoprotein receptor (LDLr) pathway. FH is the most common inherited lipid disorder  
5 that accelerates atherosclerotic cardiovascular disease (CVD). However, the majority  
6 of people with FH are undiagnosed and undertreated<sup>1</sup>. FH is a public health problem  
7 throughout the world. The prevalence of heterozygous FH is estimated to be 1 in 200  
8 to 1 in 500<sup>2-6</sup> in unselected community populations, with an estimated 3.6 million  
9 individuals in the Asia-Pacific region alone<sup>7</sup> and less than 1% are considered to be  
10 formally diagnosed in the region<sup>8,9</sup>. FH healthcare in the region leaves much to be  
11 desired.

12 Primary care physicians (PCPs) or family doctors are well placed in the community  
13 to opportunistically detect FH<sup>10,11</sup> and need to be involved in the care of these  
14 patients. The role of primary care in the care of FH has not been adequately defined  
15 and our preliminary data suggest a significant shortfall in knowledge and awareness  
16 among family doctors<sup>7,12</sup>. As part of the “Ten Countries Study”<sup>13</sup>, we investigated  
17 several aspects of the knowledge, awareness and preferences of FH among PCPs  
18 in ten countries/regions, primarily in the Asia-Pacific Region.

## 19 METHODS

20 The methodology for the present study has been previously described as part of the  
21 overarching “Ten Countries Study”<sup>13</sup>, a project investigating several aspects of the  
22 care of FH. The United Kingdom, a country with a highly developed healthcare  
23 system and a sophisticated guideline for the care of FH developed by the National  
24 Institute for Health and Care Excellence (NICE)<sup>14</sup>, was included to provide the  
25 international benchmark.

26 In brief, a formal questionnaire was offered to PCPs via cardiovascular education  
27 sessions, conferences and/or mail lists from the country-equivalent Royal Colleges.  
28 Language-specific versions of the questionnaire were developed from the English-  
29 language version via standardised back-translation techniques and the aid of  
30 bilingual translators. The survey inquired about the following aspects of FH:  
31 familiarity with the condition, awareness of national and international guidelines for



1  
2  
3 1 FH; the clinical description of FH; identification of the typical lipid profile; prevalence  
4 and inheritance of FH; extent of elevation in risk of CVD, whether the diagnosis  
5 requires genetic confirmation; methods for alerting PCPs about the possibility of FH;  
6 type of health professional best placed to detect FH; number of patients with FH  
7 currently being treated; specific treatments; knowledge and practices concerning  
8 family screening; treatment and referral practices regarding patients with severely  
9 elevated cholesterol. Demographic data were also recorded.

10  
11  
12  
13  
14  
15 8 Between March 2014 and August 2016, the survey was completed voluntarily and  
16 anonymously among physicians in nine countries and/or regions in Asia-Pacific  
17 (Australia, Japan, Malaysia, South Korea, Philippines, Hong Kong, China, Vietnam  
18 and Taiwan), as well as the United Kingdom<sup>15</sup>. Results from the PCPs surveyed in  
19 the United Kingdom and the details of the survey have been published<sup>15</sup>. Data were  
20 analysed using STATA 12 (StataCorp). Chi-squared tests were performed to  
21 compare the Asia-Pacific PCPs to the United Kingdom. The survey responses from  
22 each country/region was compared to the United Kingdom, as the reference group.  
23 The differences were investigated using logistic regression analyses. Significance  
24 was defined at the 5% level.

## 25 26 27 28 29 30 31 32 33 18 **RESULTS**

34  
35 19 1,335 physicians completed the questionnaire; 257 physicians declared themselves  
36 to be specialist physicians and were excluded from the study. 1,078 PCPs from  
37 Australia (n=151), Japan (n=197), Malaysia (n=219), South Korea (n=97),  
38 Philippines (n=62), Hong Kong (n=59), China (n=118), Vietnam (n=137) and Taiwan  
39 (n=38) were included in the study. 54% of the respondents were male. There were a  
40 greater proportion of male respondents from Japan (84%) and South Korea (81%)  
41 compared with Malaysia (24%) and the Philippines (37%). Overall, practice location  
42 was spread over urban/metropolitan (63%), suburban/outer metropolitan (17%) and  
43 rural (20%) areas. Respondents from Hong Kong and Taiwan were all based in  
44 urban/metropolitan areas, possibly owing to the small size of their regions  
45 (<40,000km<sup>2</sup>). Table 1 details the demographics of the PCPs from the individual  
46 countries/regions and their knowledge, awareness and preferences regarding FH.  
47 100 PCPs from the United Kingdom were the comparator group.

48  
49  
50  
51  
52  
53  
54  
55  
56  
57  
58  
59  
60

1 A third of PCPs from Asia-Pacific rated their familiarity with FH as above average  
2 (>4, from a scale of 1 to 7). Although self-perceived familiarity with FH was not  
3 significantly different among most countries (except lower in Japan and China) and  
4 the United Kingdom, awareness of FH guidelines was significantly lower in Asia-  
5 Pacific compared with the United Kingdom (35% vs 61%,  $p<0.001$ ). Similarly, the  
6 awareness of lipid specialists for referral or medical advice was significantly lower in  
7 Asia-Pacific compared with the United Kingdom (35% vs 50%,  $p=0.003$ ); only  
8 Australian and Taiwanese PCPs were comparably aware. Regarding the knowledge  
9 of FH, PCPs from the United Kingdom were significantly better at selecting the  
10 correct FH description (89% vs 72%,  $p=0.001$ ) compared with the Asia-Pacific PCPs.

11 In spite of the lower self-perceived familiarity with FH, Japanese and Chinese  
12 physicians were significantly better at identifying the correct FH lipid profile,  
13 compared with the United Kingdom. The response to questions concerning the  
14 prevalence, inheritance and CVD risk of FH were suboptimal in all countries/regions,  
15 and particularly in China and Vietnam. Half of the PCPs correctly identified that  
16 genetic testing was not required to accurately diagnose FH. The majority of PCPs  
17 selected statins as the best pharmacotherapy to best treat hypercholesterolaemia,  
18 with a significantly lower proportion of PCPs selecting this from Japan and Vietnam,  
19 compared with the United Kingdom. Half of the PCPs selected the combination of  
20 statin and ezetimibe to treat severe hypercholesterolemia, with a significantly higher  
21 proportion of PCPs selecting this from Australia, South Korea and China, compared  
22 with the United Kingdom.

23 Concerning practices relating to FH, PCPs from the Asia-Pacific region and the  
24 United Kingdom were equally likely to screen patients with premature CAD for their  
25 family history of CVD. Of PCPs who had FH patients under their care, 66% from  
26 Asia-Pacific and 73% the United Kingdom responded that they would perform routine  
27 screening of their family members and there was no significant difference. However,  
28 Japanese PCPs caring for FH patients were the lowest who would undertake family  
29 screening among the countries/regions. The most prevalent age for screening young  
30 people in a kindred with FH was selected at 13-18 years. Although awareness of  
31 lipid specialists were suboptimal, in PCPs that were aware of lipid specialists, only  
32 56% had referred FH patients to a lipid specialist in the Asia-Pacific region,

1 compared with 72% in the United Kingdom which was significantly higher ( $p=0.028$ );  
2 Japan, Philippines, Vietnam and Malaysia were particularly low.

3 The majority of PCPs from the United Kingdom (82%) selected themselves as the  
4 most effective health care provider for the early detection of FH. However, the  
5 response was highly disparate in the Asia-Pacific region, with only 8% of responses  
6 from China and 23% from Vietnam identifying PCPs as the preferred health care  
7 provider for the early detection of FH. By contrast, 92% of from Malaysia and 80%  
8 from Australia, selected PCPs (Table 1). Overall, cardiologists (38%), lipid specialists  
9 (36%) and endocrinologists (10%) were also selected by the PCPs from the Asia-  
10 Pacific. However, PCPs did not consider that there was a significant role for  
11 paediatricians, obstetricians/gynaecologists and/or nurses with cardiac training in the  
12 care of FH. The majority of PCPs selected an interpretive laboratory comment on  
13 lipid test report results as being useful in detecting FH.

## 14 DISCUSSION

15 Recent knowledge of the population frequency of FH suggests that it can be viewed  
16 as a public health problem. Strategies for improving early diagnosis and care of FH  
17 in the community requires adequate knowledge and appropriate practices  
18 concerning this condition. This study is the first survey to demonstrate significant  
19 gaps in knowledge and awareness of FH across several countries/regions in the  
20 Asia-Pacific and to identify important areas of deficit.

21 In the present study, the lack of awareness of guidelines and lipid specialists can be  
22 related to the lack of country-specific guidelines<sup>16</sup> on FH and the lack of physicians  
23 specifically trained and practicing as lipid experts in the region. Although the UK  
24 performed significantly better on these questions compared with the  
25 countries/regions in the Asia-Pacific, the results were still suboptimal. 39% were  
26 unaware of FH guidelines despite the fact that the NICE guidelines for identifying FH  
27 were released 7-8 years ago, and 50% were not aware of a lipid specialist in spite of  
28 the efforts from Heart UK in mapping specialist lipid clinics and establishing an FH  
29 Intelligence Network. Lack of awareness of clinical services for lipid disorders may  
30 be because specialist services do not exist in their geographical area, particularly for  
31 PCPs practising in suburban and rural regions, which constituted 43% of the PCPs  
32 surveyed.

1 The PCPs were generally able to correctly define FH. However, knowledge of FH  
2 prevalence, heritability and risk of CVD were suboptimal. Three quarters of PCPs in  
3 the present study were not aware of the theoretical prevalence of FH of 1:500 (with  
4 42% selecting 'don't know') and 91% were not aware of the >20-fold risk of CVD in  
5 untreated FH<sup>17</sup> (with 30% selecting 'don't know'). However, as demonstrated by  
6 recent studies, heterozygous FH may be more common than 1:500<sup>2-6</sup> and CVD risk  
7 could be ~10-fold<sup>18</sup>, varying with age. Taking this into account, 45% of respondents  
8 identified the prevalence as between 1:100-1:1000 and 60% selected CVD risk to be  
9 5-20 times greater. Although still suboptimal, this at least indicates an understanding  
10 that the risk of CVD is high among patients with FH.

11 Knowledge and familiarity with lipid-lowering treatment was reassuring; most PCPs  
12 identified statins to best treat hypercholesterolaemia. A lower proportion of  
13 physicians from Japan and Vietnam selected statins, which may relate to the  
14 availability of alternative medication (eg. probucol) and the lack of access to statins  
15 in some regions. Owing to the severity of hypercholesterolaemia, most FH patients  
16 will require additional therapy to reach treatment goals<sup>1</sup>. PCPs from China, South  
17 Korea and Australia were particularly good at selecting combination statin and  
18 ezetimibe therapy for treating severe hypercholesterolaemia. By contrast, selection of  
19 combination statin and ezetimibe therapy in Vietnam was low and this may relate to  
20 the lack of general access to pharmacotherapies.

21 PCPs are critical in achieving long-term treatment adherence and have a key role in  
22 recognising family history of premature CAD. An accurate family history is integral to  
23 both CVD risk assessment and the diagnosis of FH. Encouragingly, 90% of PCPs  
24 would take a detailed family history in patients with premature CAD. However, there  
25 were gaps in cascade screening of close relatives, especially in Japan. Although the  
26 European guidelines suggest screening of children in an FH kindred from the age of  
27 5 years<sup>19</sup> and the NICE guidelines recommend screening children between 2-10  
28 years, PCPs in the Asia-Pacific region considered that testing between 13-18 years  
29 of age was a more appropriate practice. Studies on cholesterol screening in US  
30 paediatricians raised concerns regarding conflicting guidelines on lipid screening and  
31 treatment practices<sup>20</sup> and half of the paediatricians were opposed to the use of lipid-  
32 lowering therapies in children<sup>20 21</sup>.

1  
2  
3 1 Differences in the choice of healthcare professional perceived as best suited for  
4 2 managing FH and family screening among the countries/regions may reflect different  
5 3 healthcare systems. In particular, 83% of Chinese PCPs considered that lipid  
6 4 specialists were better suited to manage FH. There was the view that cardiologists  
7 5 are well positioned to identify index cases with FH presenting with coronary events<sup>22</sup>  
8 6 <sup>23</sup>. Similarly, endocrinologists were considered well placed to identify FH in a  
9 7 secondary prevention setting. Overall, respondents in the present study considered  
10 8 that PCPs were best situated to identify FH in the primary prevention setting. Few  
11 9 considered that there was a significant role for nurses. This differs from the  
12 10 Netherlands<sup>24</sup> where screening programs have been conducted by nursing and/or  
13 11 allied health staff. Further exploration of health services and systems are warranted  
14 12 to optimise country-specific clinical service models and integration of care<sup>1</sup>.

13 The majority of PCPs in the present study thought that interpretative commenting  
14 14 attached to the reports on lipid profiles in people at high-risk of FH would be useful.  
15 15 This mode of alerting could play a role in the detection and management of FH<sup>25</sup>.  
16 16 Electronic screening tools to retrospectively identify FH in general practices could  
17 17 also be useful; some preliminary work from the United Kingdom and Australia has  
18 18 demonstrated the potential to increase identification of FH via this method<sup>26-28</sup>. Other  
19 19 methods such as screening via the laboratory<sup>29 30</sup> and improving communication  
20 20 between the requesting physician and the chemical pathologist<sup>31</sup> may also be useful.  
21 21 Implementing these in service mode will require an integrated collaborative approach  
22 22 with local laboratories, pathologists and treating physicians.

23 Increased lipoprotein(a) [Lp(a)], smoking, hypertension and diabetes are all known to  
24 24 compound CVD risk and are predictors of CAD in FH<sup>32-39</sup>. A limitation of the present  
25 25 survey was that CVD risk factors were not explored, particularly with the increasing  
26 26 prevalence of risk factors in Asia<sup>40</sup>. Another limitation of the study may be the self-  
27 27 selected group that responded to the questionnaire and may reflect those with more  
28 28 interest and knowledge in lipid disorders. Since the survey was conducted  
29 29 anonymously, there was no recorded information on non-responders.

30 Similar surveys have been undertaken in PCPs<sup>12</sup> and pharmacists<sup>41</sup> in Western  
31 31 Australia, cardiologists in the US<sup>23</sup> and physicians in India<sup>42</sup>, as well as a pilot study  
32 32 among physicians in Japan, South Korea, Taiwan<sup>7</sup>. Knowledge shortfalls were

1 comparable, with underestimations of prevalence, heritability and CVD risk. A  
2 recent study by *Schofield et al*<sup>43</sup> assessed FH knowledge among a diverse group of  
3 health care professionals (including nurses and pharmacists in the United Kingdom  
4 and demonstrated knowledge gaps in FH prevalence, diagnostic criteria and  
5 treatment options. In a smaller cohort (n=35) of health care professionals that  
6 completed a second survey following an FH education session, all aspects of FH  
7 knowledge was improved. *Bell et al*<sup>44</sup> have also shown that with direct education,  
8 PCPs are able to accurately assess FH. This emphasises the important of investing  
9 in FH education programs<sup>45</sup>. A global initiative, the European Atherosclerosis Society  
10 FH Studies Collaboration was launched with aims to disseminate information to  
11 empower the medical and lay community to seek changes to improve the care of  
12 patients and families with FH<sup>46</sup>.

13 Screening programs in the region have been communicated by Singapore<sup>47</sup> and  
14 Hong Kong<sup>48</sup>. Owing to high population densities in the region, family cascade  
15 screening after the detection of an index case with FH could be particularly efficient  
16 and cost-effective. However, specific diagnostic criteria and guidelines in the region  
17 are only available from Australia<sup>49</sup>, Japan<sup>50</sup> and South Korea<sup>51</sup>. The Australasian  
18 model of care is a comprehensive clinical guideline encompassing elements of index  
19 case detection, diagnosis and assessment, management, cascade screening,  
20 genetic testing and the organisation of clinical services<sup>49</sup>. The Japanese criteria are  
21 based on the detection of tendon xanthomata<sup>50</sup>, which may only be present in ~30%  
22 of FH patients and particularly uncommon in the young<sup>52</sup>, and hence may have low  
23 sensitivity in screening and detecting FH. A study from South Korea demonstrated  
24 the lack of detection power with all conventional clinical criteria and suggested an  
25 LDL-C cut-off of 225mg/dL (~5.8mmol/L)<sup>51</sup>. However, the LDL-C cut-off was derived  
26 from a biased sample of patients with existing hypercholesterolemia. The lack of  
27 country-specific criteria may contribute to the lack of active screening programs  
28 employed in the region and the cost of genetic testing in the community beyond  
29 research studies is not justified. FH research in the region is highly warranted; the  
30 mutation spectrum of FH is different from the European spectrum<sup>53</sup> and the mean  
31 cholesterol concentrations in most Asian countries are lower compared with Western  
32 countries<sup>16</sup>.

1  
2  
3 1 The integrated international guidance on FH<sup>1</sup>, endorsed by the Asian-Pacific Society  
4 of Atherosclerosis and Vascular Disease<sup>54</sup>, provides a foundation for developing  
5 country-specific guidelines, services and models of care. The principles are similar,  
6 but require the development of country-specific recommendations to screen,  
7  
8 but require the development of country-specific recommendations to screen,  
9  
10 diagnose and treat FH, as well as strategies for long-term adherence and goal  
11 attainment<sup>55</sup>. Country-specific challenges in developing screening programs may  
12 relate to their healthcare systems, as well as diverse cultures, political systems and  
13 economies<sup>56 57</sup> in the region. Challenges in treatment and management include the  
14 tolerability of statins, its availability and affordability<sup>58</sup>, and its acceptability against  
15 the popularity of complementary and alternative medicines<sup>59 60</sup>. The FH “Ten  
16 Countries Study” group is the first collaborative effort in the region focusing  
17 specifically on FH and should hopefully see the extension of the series of studies,  
18 including the present study, into the translation and transference of the research  
19 findings to country-specific models of care<sup>13</sup>.

## 26 27 **CONCLUSION**

28  
29  
30 16 The present study identified substantial deficits in FH knowledge and awareness  
31 among physicians in the Asia-Pacific region, in particular, awareness of guidelines  
32 and knowledge of diagnostic features of FH. Knowledge of FH heritability,  
33 prevalence and CVD risk were also suboptimal. Major treatment gaps were identified  
34 in Vietnam and gaps in family screening were noted in Japan. However, through  
35 extensive FH education, awareness programs and implementation of country-  
36 specific guidelines, these gaps can be addressed to accelerate the pace of FH  
37 diagnosis and treatment. Similar surveys are required in specialists practicing  
38 coronary prevention in the region. A potentially effective method of standardising  
39 care across countries is participation in an international registry<sup>61</sup>.

## 1 **Acknowledgement**

2 The study was undertaken under the aegis of the FH Australasia Network (FHAN), the  
3 Australian Atherosclerosis Society (AAS) Inc and the Asian-Pacific Society of  
4 Atherosclerosis and Vascular Disease (APSAVD). We thank Ms Natasha Whitwell and  
5 Ms Jennifer Seabrook for their excellent assistance. We also acknowledge the team  
6 members for this “Ten Countries Study” project: Suraya Abdul-Razak, Norsiah Ali and  
7 Mohammad Husni Jamal.

## 9 **Funding**

10 The “Ten Countries Study” was funded by the International Atherosclerosis Society (IAS)  
11 and Pfizer Independent Grants for Learning & Change (Grant ID: 10839501). The data  
12 collection in Malaysia was partly funded by the Universiti Teknologi MARA (UiTM) Lestari  
13 Grant Scheme no: 600-IRMI/DANA 5/3/LESTARI (0161/2016).

## 15 **Competing interests**

16 All authors have completed the Unified Competing Interest form. TM reports grants from  
17 JSPS during the conduct of the study; grants from Denka-Seiken, Shino-test, MSD and  
18 Otsuka outside the submitted work; and honoraria from Sanofi, Astellas-Amgen, Astra  
19 Zeneca, Otsuka, Takeda, Kowa, Denka-Seiken, Sekisui-Medical, Kyowa Medex and  
20 Wako. HS reports research grants from Alexion, Amgen, MSD and Pfizer; and personal  
21 fees and education grants from Aegerion, Amgen, Janssen Cilag Ltd, MSD, Pfizer, Novo  
22 Nordisk and Sanofi. SY reports grants and personal fees from Kowa, Otsuka, Shionogi,  
23 Bayer Yakuhin, MSD, Takeda, Sanwa Kagaku Kenkyusho, Astellas, Daiichi-Sankyo,  
24 Astra Zeneca and Kaken; grants from Nippon Boehringer Ingelheim, Kyowa Medex,  
25 Mochida, Hayashibara, Teijin, Kissei and National Institute of Biomedical Innovation; and  
26 personal fees from Medical Review Co., Skylight Biotech, Pfizer, Bristol-Meyers, Astellas-  
27 Amgen, Sanofi, Agerion and Toa Eiyuu, outside the submitted work. In addition, SY has  
28 two pending patents, Fujirebio and Kyowa Medex. BT reports grants and personal fees  
29 from Amgen; grants from AstraZeneca, Merk Sharp & Dohme, Novartis, Pfizer and  
30 Roche; personal fees from Merck Serono and Sanofi, outside the submitted work. GFW  
31 reports grants from Sanofi /Regeneron during the conduct of the study; grants and  
32 personal fees from Sanofi /Regeneron and Amgen; personal fees from Gemphire and



1  
2  
3 1 Kowa, outside the submitted work. JP, THT, NTK, ASR, JEP, LGS, JL, XW, MH, HMN  
4 2 and SK have nothing to disclose.

### 3 **Contributorship statement**

4 JP designed data collection tools, implemented the study for the all countries, monitored  
5 data collection, cleaned and analysed the data, and drafted and revised the paper. MH  
6 and BT implemented the study in Hong Kong and revised the draft paper. JL and XW  
7 implemented the study in China and revised the draft paper. TM and SY implemented the  
8 study in Japan and revised the draft paper. HMN and ASR implemented the study in  
9 Malaysia and revised the draft paper. JEP implemented the study in Vietnam and revised  
10 the draft paper. THT and NTK implemented the study in Vietnam and revised the draft  
11 paper. HS and SK implemented the study in the United Kingdom and revised the draft  
12 paper. LGS implemented the study in the Philippines and revised the draft paper. TS  
13 implemented the study in Taiwan and revised the draft paper. GFW initiated the  
14 collaborative project, designed data collection tools, implemented the study for the all  
15 countries, advised the statistical analysis plan and revised the paper.

### 16 **Transparency declaration**

17 JP affirms that the manuscript is an honest, accurate, and transparent account of the  
18 study being reported; that no important aspects of the study have been omitted; and that  
19 any discrepancies from the study as planned (and, if relevant, registered) have been  
20 explained.

### 21 **Date sharing statement**

22 No additional data available. Extra details on data presented in the current study is  
23 available by emailing [jing.pang@uwa.edu.au](mailto:jing.pang@uwa.edu.au).

1  
2  
3 **Table 1: Summary of PCP's demographics and responses to questions (%) about awareness, knowledge, practices and preferences regarding FH in "Ten Countries".**

| 4 Country/Region                                                                                                 | Australia | Japan | Malaysia | South Korea | Philippines | Hong Kong | China | Vietnam | Taiwan | United Kingdom <sup>15</sup> |
|------------------------------------------------------------------------------------------------------------------|-----------|-------|----------|-------------|-------------|-----------|-------|---------|--------|------------------------------|
| 5 Number of PCPs                                                                                                 | 151       | 197   | 219      | 97          | 62          | 59        | 118   | 137     | 38     | 100                          |
| 6 <b>DEMOGRAPHICS</b>                                                                                            |           |       |          |             |             |           |       |         |        |                              |
| 7 Male                                                                                                           | 62%       | 84%   | 24%      | 81%         | 37%         | 53%       | 42%   | 46%     | 74%    | 42%                          |
| 8 Urban/Metropolitan                                                                                             | 52%       | 49%   | 63%      | 82%         | 63%         | 100%      | 82%   | 40%     | 100%   | 47%                          |
| 9 Suburban/Outer metropolitan                                                                                    | 33%       | 30%   | 0%       | 14%         | 15%         | 0%        | 18%   | 27%     | 0%     | 44%                          |
| 10 Rural                                                                                                         | 16%       | 21%   | 37%      | 4%          | 23%         | 0%        | 0%    | 33%     | 0%     | 9%                           |
| 11 <b>AWARENESS</b>                                                                                              |           |       |          |             |             |           |       |         |        |                              |
| 12 Familiarity of FH rated as above average                                                                      | 32%       | 23%   | 38%      | 28%         | 34%         | 50%       | 23%   | 49%     | 47%    | 39%                          |
| 13 Awareness about FH guidelines                                                                                 | 36%       | 47%   | 35%      | 34%         | N/A         | 43%       | 8%    | 28%     | 53%    | 61%                          |
| 14 Awareness about lipid specialists                                                                             | 51%       | 33%   | 34%      | 30%         | 31%         | 40%       | 12%   | 39%     | 57%    | 50%                          |
| 15 <b>KNOWLEDGE</b>                                                                                              |           |       |          |             |             |           |       |         |        |                              |
| 16 Correctly described FH                                                                                        | 72%       | 77%   | 86%      | 51%         | 73%         | 62%       | 75%   | 65%     | 60%    | 89%                          |
| 17 Correctly identified lipid profile                                                                            | 59%       | 85%   | 65%      | 57%         | 48%         | 51%       | 85%   | 45%     | 61%    | 74%                          |
| 18 Correctly identified prevalence of FH in the community                                                        | 26%       | 41%   | 24%      | 19%         | 16%         | 11%       | 17%   | 14%     | 30%    | 30%                          |
| 19 Correctly identified the transmission rate of FH to first degree relatives                                    | 44%       | 40%   | 49%      | 42%         | 37%         | 49%       | 36%   | 26%     | 61%    | 51%                          |
| 20 Correctly identified the CVD risk in untreated FH patients                                                    | 14%       | 13%   | 9%       | 8%          | 10%         | 7%        | 4%    | 2%      | 5%     | 14%                          |
| 21 Correctly identified that genetic testing was not required to accurately diagnose FH                          | 50%       | 52%   | 47%      | 64%         | 68%         | 38%       | 38%   | 58%     | 24%    | 52%                          |
| 22 Selected statins to best treat hypercholesterolemia                                                           | 89%       | 85%   | 96%      | 90%         | 95%         | 93%       | 95%   | 75%     | 95%    | 94%                          |
| 23 Selected a combination of statin and ezetimibe to treat severe hypercholesterolemia                           | 64%       | 48%   | 56%      | 70%         | 48%         | 49%       | 77%   | 31%     | 63%    | 50%                          |
| 24 <b>PRACTICE</b>                                                                                               |           |       |          |             |             |           |       |         |        |                              |
| 25 Screened patients with premature CAD for family history                                                       | 93%       | 83%   | 95%      | 89%         | 92%         | 95%       | 94%   | 85%     | 95%    | 90%                          |
| 26 Performed routine family screening of patients with FH (if there were FH patients under their care)           | 86%       | 30%   | 82%      | 50%         | 53%         | 90%       | 47%   | 83%     | 77%    | 73%                          |
| 27 The most prevalent age for screening young people in a kindred with FH was 13-18 years, which was selected by | 52%       | 18%   | 52%      | 54%         | 52%         | 48%       | 16%   | 33%     | 20%    | 45%                          |
| 28 Have referred FH patients to a lipid specialists (if aware of lipid specialist)                               | 66%       | 26%   | 52%      | 57%         | 32%         | 86%       | 86%   | 49%     | 100%   | 72%                          |
| 29 <b>PREFERENCE</b>                                                                                             |           |       |          |             |             |           |       |         |        |                              |
| 30 Selected PCPs as the most effective health care provider for the early detection of FH                        | 80%       | 45%   | 92%      | 71%         | 58%         | 76%       | 8%    | 23%     | 50%    | 82%                          |
| 31 Selected interpretive commenting on lipid profiles to highlight patients at risk of FH                        | 89%       | 57%   | 92%      | 84%         | 92%         | 85%       | 86%   | 72%     | 89%    | 88%                          |

1  
2  
3  
4  
5  
6  
7  
8  
9  
10  
11  
12  
13  
14  
15  
16  
17  
18  
19  
20  
21  
22  
23  
24  
25  
26  
27  
28  
29  
30  
31  
32  
33  
34  
35  
36  
37  
38  
39  
40  
41  
42  
43  
44  
45  
46  
47  
48  
49

1

For peer review only

1

2 **Table 2: Comparison of PCP's responses to questions about FH awareness, knowledge, practices and preferences with the United Kingdom as the**  
 3 **reference group using logistic regression analyses; odds ratio (95% confidence interval) shown.**

| Country/Region                                                                                      | Australia             | Japan                 | Malaysia              | South Korea           | Philippines          | Hong Kong             | China                 | Vietnam               | Taiwan                |
|-----------------------------------------------------------------------------------------------------|-----------------------|-----------------------|-----------------------|-----------------------|----------------------|-----------------------|-----------------------|-----------------------|-----------------------|
| <b>AWARENESS</b>                                                                                    |                       |                       |                       |                       |                      |                       |                       |                       |                       |
| Familiarity of FH rated as above average                                                            | 0.73<br>(0.43-1.24)   | 0.47<br>(0.28-0.79)*  | 0.95<br>(0.58-1.55)   | 0.61<br>(0.33-1.11)   | 0.80<br>(0.41-1.55)  | 1.56<br>(0.81-3.01)   | 0.46<br>(0.25-0.83)*  | 1.52<br>(0.90-2.57)   | 1.41<br>(0.66-2.99)   |
| Awareness about FH guidelines                                                                       | 0.34<br>(0.21-0.61)** | 0.58<br>(0.36-0.95)*  | 0.35<br>(0.22-0.58)** | 0.34<br>(0.19-0.61)** | N/A                  | 0.49<br>(0.26-0.95)*  | 0.05<br>(0.02-0.12)** | 0.25<br>(0.14-0.43)** | 0.72<br>(0.34-1.53)   |
| Awareness about lipid specialists                                                                   | 1.03<br>(0.62-1.71)   | 0.5<br>(0.30-0.82)*   | 0.51<br>(0.31-0.83)*  | 0.43<br>(0.24-0.78)*  | 0.44<br>(0.23-0.86)* | 0.68<br>(0.35-1.31)   | 0.14<br>(0.07-0.27)** | 0.64<br>(0.37-1.11)   | 1.33<br>(0.61-2.90)   |
| <b>KNOWLEDGE</b>                                                                                    |                       |                       |                       |                       |                      |                       |                       |                       |                       |
| Correctly described FH                                                                              | 0.33<br>(0.16-0.68)*  | 0.42<br>(0.21-0.86)*  | 0.78<br>(0.37-1.62)   | 0.13<br>(0.06-0.28)** | 0.34<br>(0.15-0.78)* | 0.21<br>(0.09-0.48)** | 0.38<br>(0.18-0.82)*  | 0.24<br>(0.12-0.50)** | 0.19<br>(0.07-0.50)*  |
| Correctly identified lipid profile                                                                  | 0.52<br>(0.30-0.90)*  | 2.06<br>(1.12-3.77)*  | 0.65<br>(0.38-1.10)   | 0.47<br>(0.26-0.85)*  | 0.33<br>(0.17-0.65)* | 0.37<br>(0.18-0.65)*  | 2.07<br>(1.05-4.10)*  | 0.29<br>(0.16-0.51)** | 0.55<br>(0.25-1.20)   |
| Correctly identified prevalence of FH in the community                                              | 0.80<br>(0.46-1.41)   | 1.60<br>(0.96-2.69)   | 0.73<br>(0.43-1.25)   | 0.54<br>(0.27-1.06)   | 0.44<br>(0.20-0.99)  | 0.28<br>(0.11-0.71)*  | 0.49<br>(0.25-0.93)*  | 0.38<br>(0.20-0.73)*  | 0.97<br>(0.43-2.22)   |
| Correctly identified the transmission rate of FH to first degree relatives                          | 0.74<br>(0.44-1.23)   | 0.63<br>(0.39-1.03)   | 0.91<br>(0.56-1.48)   | 0.70<br>(0.38-1.27)   | 0.57<br>(0.30-1.08)  | 0.92<br>(0.46-1.84)   | 0.54<br>(0.31-0.93)*  | 0.34<br>(0.19-0.59)** | 1.52<br>(0.68-3.46)   |
| Correctly identified the CVD risk in untreated FH patients                                          | 0.97<br>(0.46-2.02)   | 0.90<br>(0.44-1.83)   | 0.59<br>(0.28-1.22)   | 0.56<br>(0.22-1.40)   | 0.66<br>(0.24-1.81)  | 0.46<br>(0.14-1.48)   | 0.28<br>(0.10-0.81)*  | 0.15<br>(0.04-0.52)*  | 0.34<br>(0.07-1.58)   |
| Correctly identified that genetic testing was not required to accurately diagnose FH                | 0.91<br>(0.55-1.51)   | 1.00<br>(0.61-1.62)   | 0.83<br>(0.51-1.33)   | 1.63<br>(0.92-2.90)   | 1.94<br>(1.00-3.76)  | 0.56<br>(0.29-1.09)   | 0.56<br>(0.33-0.97)*  | 1.28<br>(0.76-2.17)   | 0.30<br>(0.13-0.96)*  |
| Selected statins to best treat hypercholesterolemia                                                 | 0.50<br>(0.19-1.32)   | 0.37<br>(0.15-0.92)*  | 1.68<br>(0.57-4.99)   | 0.56<br>(0.19-1.59)   | 1.26<br>(0.30-5.21)  | 0.88<br>(0.24-3.25)   | 1.19<br>(0.37-3.82)   | 0.19<br>(0.08-0.48)*  | 0.74<br>(0.18-3.14)   |
| Selected a combination of statin and ezetimibe to treat severe hypercholesterolemia                 | 1.75<br>(1.04-2.92)*  | 0.91<br>(0.56-1.48)   | 1.26<br>(0.78-2.02)   | 2.34<br>(1.31-4.21)*  | 0.94<br>(0.50-1.77)  | 0.97<br>(0.51-1.84)   | 3.37<br>(1.88-6.03)** | 0.46<br>(0.27-0.78)*  | 1.71<br>(0.80-3.69)   |
| <b>PRACTICE</b>                                                                                     |                       |                       |                       |                       |                      |                       |                       |                       |                       |
| Screened patients with premature CAD for family history                                             | 1.57<br>(0.63-3.91)   | 0.53<br>(0.25-1.23)   | 2.10<br>(0.86-5.12)   | 0.87<br>(0.35-2.15)   | 1.27<br>(0.41-3.90)  | 2.07<br>(0.55-7.86)   | 1.76<br>(0.65-4.81)   | 0.61<br>(0.28-1.37)   | 2.00<br>(0.42-9.58)   |
| Performed routine family screening of patients with FH (if there were FH patients under their care) | 2.25<br>(0.81-6.22)   | 0.16<br>(0.06-0.40)** | 1.75<br>(0.65-4.70)   | 0.38<br>(0.14-1.04)   | 0.43<br>(0.17-1.06)  | 3.38<br>(0.93-12.21)  | 0.34<br>(0.10-1.10)   | 1.88<br>(0.34-10.27)  | 1.23<br>(0.39-3.86)   |
| Selected 13-18 years as most appropriate for screening young people in a kindred with FH            | 1.32<br>(0.79-2.21)   | 0.27<br>(0.16-0.47)** | 1.30<br>(0.81-2.10)   | 1.42<br>(0.81-2.51)   | 1.28<br>(0.68-2.42)  | 1.12<br>(0.58-2.15)   | 0.23<br>(0.12-0.43)** | 0.59<br>(0.34-1.02)   | 0.30<br>(0.12-0.75)*  |
| Have referred FH patients to a lipid specialists (if aware of lipid specialist)                     | 0.75<br>(0.34-1.64)   | 0.14<br>(0.06-0.32)** | 0.42<br>(0.20-0.91)*  | 0.52<br>(0.20-1.37)   | 0.18<br>(0.06-0.57)* | 2.33<br>(0.59-9.18)   | 2.33<br>(0.46-11.78)  | 0.37<br>(0.15-0.88)*  | 1<br>(0.15-0.88)*     |
| <b>PREFERENCE</b>                                                                                   |                       |                       |                       |                       |                      |                       |                       |                       |                       |
| Selected PCPs as the most effective health care provider for the early detection of FH              | 0.89<br>(0.46-1.69)   | 0.18<br>(0.10-0.32)** | 2.61<br>(1.28-5.31)*  | 0.54<br>(0.28-1.06)   | 0.30<br>(0.15-0.62)* | 0.71<br>(0.32-1.55)   | 0.02<br>(0.01-0.05)** | 0.07<br>(0.04-0.13)** | 0.22<br>(0.10-0.50)** |
| Selected interpretive commenting on lipid profiles to highlight patients at risk of FH              | 1.15<br>(0.52-2.55)   | 0.18<br>(0.09-0.35)*  | 1.52<br>(0.70-3.30)** | 0.69<br>(0.31-1.55)   | 1.55<br>(0.52-4.65)  | 0.76<br>(0.30-1.92)   | 0.81<br>(0.37-1.79)   | 0.36<br>(0.17-0.72)*  | 1.16<br>(0.35-3.84)   |

\*p<0.05, \*\*p<0.001, =worse than the United Kingdom, =better than the United Kingdom.

5

1  
2  
3 **References**  
4

- 5 1. Watts GF, Gidding S, Wierzbicki AS, et al. Integrated Guidance on the Care of Familial  
6 Hypercholesterolaemia from the International FH Foundation. *Int J Cardiol*  
7 2014;171(3):309-25.
- 8 2. Benn M, Watts GF, Tybjaerg-Hansen A, et al. Familial Hypercholesterolemia in the Danish  
9 General Population: Prevalence, Coronary Artery Disease, and Cholesterol-Lowering  
10 Medication. *J Clin Endocrinol Metab* 2012;97(11):3956-64.
- 11 3. Shi Z, Yuan B, Zhao D, et al. Familial hypercholesterolemia in China: Prevalence and  
12 evidence of underdetection and undertreatment in a community population. *Int J*  
13 *Cardiol* 2014;174(3):834-36.
- 14 4. Watts GF, Shaw JE, Pang J, et al. Prevalence and treatment of familial  
15 hypercholesterolemia in Australian communities. *Int J Cardiol* 2015;185:69-71. doi:  
16 10.1016/j.ijcard.2015.03.027
- 17 5. Miller PE, Martin SS, Toth PP, et al. Screening and advanced lipid phenotyping in familial  
18 hypercholesterolemia: The Very Large Database of Lipids Study-17 (VLDL-17). *J Clin*  
19 *Lipidol* 2015;9(5):676-83.
- 20 6. de Ferranti SD, Rodday AM, Mendelson MM, et al. Prevalence of Familial  
21 Hypercholesterolemia in the 1999 to 2012 United States National Health and  
22 Nutrition Examination Surveys (NHANES). *Circulation* 2016;133(11):1067-72. doi:  
23 10.1161/circulationaha.115.018791
- 24 7. Pang J, Sullivan DR, Harada-Shiba M, et al. Significant gaps in awareness of familial  
25 hypercholesterolemia among physicians in selected Asia-Pacific countries: A pilot  
26 study. *J Clin Lipidol* 2015;9(1):42-48.
- 27 8. Nordestgaard B, Chapman M, Humphries S, et al. Familial hypercholesterolaemia is  
28 underdiagnosed and undertreated in the general population: guidance for clinicians  
29 to prevent coronary heart disease (Consensus Statement of the European  
30 Atherosclerosis Society). *Eur Heart J* 2013;34(45):3478 - 90.
- 31 9. Hamilton-Craig I. Case-Finding for Familial Hypercholesterolemia in the Asia-Pacific  
32 Region. *Semin Vasc Med* 2004;4(01):87-92.
- 33 10. Kirke A, Watts GF, Emery J. Detecting familial hypercholesterolaemia in general  
34 practice. *Aust Fam Physician* 2012;41(12):965-68.
- 35 11. Qureshi N, Humphries SE, Seed M, et al. Identification and management of familial  
36 hypercholesterolaemia: what does it mean to primary care? *Br J Gen Pract*  
37 2009;59(567):773-78.
- 38 12. Bell DA, Garton-Smith J, Vickery A, et al. Familial Hypercholesterolaemia in Primary  
39 Care: Knowledge and Practices among General Practitioners in Western Australia.  
40 *Heart Lung Circ* 2014;23(4):309-13. doi: 10.1016/j.hlc.2013.08.005
- 41 13. Watts GF, Ding PY, George P, et al. Translational Research for Improving the Care of  
42 Familial Hypercholesterolemia: The "Ten Countries Study" and Beyond. *J Atheroscler*  
43 *Thromb* 2016;23(8):891-900.
- 44 14. National Institute for Health and Clinical Excellence, The National Collaborating Centre  
45 for Primary Care. NICE Clinical Guideline 71: Identification and management of  
46 familial hypercholesterolaemia 2008 [Available from:  
47 [www.nice.org.uk/nicemedia/pdf/CG071NICEGuideline.pdf](http://www.nice.org.uk/nicemedia/pdf/CG071NICEGuideline.pdf).  
48
- 49 15. Kwok S, Pang J, Adam S, et al. An online questionnaire survey of UK general  
50 practitioners' knowledge and management of familial hypercholesterolaemia. *BMJ*  
51 *Open* 2016;6(11):e012691. doi: 10.1136/bmjopen-2016-012691
- 52 16. Zhou M, Zhao D. Familial Hypercholesterolemia in Asian Populations. *J Atheroscler*  
53 *Thromb* 2016;23(5):539-49. doi: 10.5551/jat.34405
- 54 17. Khera AV, Won H-H, Peloso GM, et al. Diagnostic yield and clinical utility of sequencing  
55 familial hypercholesterolemia genes in patients with severe hypercholesterolemia. *J*  
56 *Am Coll Cardiol* 2016;67(22):2578-89.
- 57  
58  
59  
60

18. Wong B, Kruse G, Kutikova L, et al. Cardiovascular Disease Risk Associated With Familial Hypercholesterolemia: A Systematic Review of the Literature. *Clin Ther* 2016;38(7):1696-709.
19. Wiegman A, Gidding SS, Watts GF, et al. Familial hypercholesterolaemia in children and adolescents: gaining decades of life by optimizing detection and treatment. *Eur Heart J* 2015;36(36):2425-37. doi: 10.1093/eurheartj/ehv157
20. de Ferranti SD, Rodday AM, Parsons SK, et al. Cholesterol Screening and Treatment Practices and Preferences: A Survey of United States Pediatricians. *The Journal of Pediatrics* 2017 doi: <http://doi.org/10.1016/j.jpeds.2016.12.078>
21. Dixon DB, Kornblum AP, Steffen LM, et al. Implementation of Lipid Screening Guidelines in Children by Primary Pediatric Providers. *The Journal of Pediatrics* 2014;164(3):572-76.
22. Watts GF, Sullivan DR, van Bockxmeer FM, et al. A New Model of Care for Familial Hypercholesterolaemia: What is the Role of Cardiology? *Heart Lung Circ* 2012;21(9):543-50.
23. Foody JM. Familial Hypercholesterolemia: An Under-recognized but Significant Concern in Cardiology Practice. *Clin Cardiol* 2013;37(2):119-25.
24. Umans-Eckenhausen MAW, Defesche JC, Sijbrands EJG, et al. Review of first 5 years of screening for familial hypercholesterolaemia in the Netherlands. *Lancet* 2001;357(9251):165-68.
25. Bell DA, Bender R, Hooper AJ, et al. Impact of interpretative commenting on lipid profiles in people at high risk of familial hypercholesterolaemia. *Clin Chim Acta* 2013;422:21-25.
26. Weng SF, Kai J, Andrew Neil H, et al. Improving identification of familial hypercholesterolaemia in primary care: Derivation and validation of the familial hypercholesterolaemia case ascertainment tool (FAMCAT). *Atherosclerosis* 2015;238(2):336-43.
27. Troeung L, Arnold-Reed D, Chan She Ping-Delfos W, et al. A new electronic screening tool for identifying risk of familial hypercholesterolaemia in general practice. *Heart* 2016;heartjnl-2015-308824v1. doi: 10.1136/heartjnl-2015-308824
28. Vickery AW, Ryan J, Pang J, et al. Increasing the Detection of FH Using General Practice Electronic Databases. *Heart Lung Circ* 2016;26:450-54. doi: 10.1016/j.hlc.2016.09.012
29. Bell DA, Hooper AJ, Bender R, et al. Opportunistic screening for familial hypercholesterolaemia via a community laboratory. *Ann Clin Biochem* 2012;49(6):534-37.
30. Bell DA, Edwards G, Hooper AJ, et al. The potential role of an expert computer system to augment the opportunistic detection of individuals with familial hypercholesterolaemia from a community laboratory. *Clin Chim Acta* 2015;448(0):18-21.
31. Bell DA, Hooper AJ, Edwards G, et al. Detecting familial hypercholesterolaemia in the community: Impact of a telephone call from a chemical pathologist to the requesting general practitioner. *Atherosclerosis* 2014;234(2):469-72.
32. Hopkins PN, Stephenson S, Wu LL, et al. Evaluation of coronary risk factors in patients with heterozygous familial hypercholesterolemia. *The American Journal of Cardiology* 2001;87(5):547-53.
33. De Sauvage Nolting PRW, Defesche JC, Buirma RJA, et al. Prevalence and significance of cardiovascular risk factors in a large cohort of patients with familial hypercholesterolaemia. *J Intern Med* 2003;253(2):161-68. doi: 10.1046/j.1365-2796.2003.01070.x
34. Jansen ACM, van Aalst-Cohen ES, Tanck MW, et al. The contribution of classical risk factors to cardiovascular disease in familial hypercholesterolaemia: data in 2400 patients. *J Intern Med* 2004;256(6):482-90. doi: 10.1111/j.1365-2796.2004.01405.x

- 1  
2  
3 1 35. Neil HAW, Seagroatt V, Betteridge DJ, et al. Established and emerging coronary risk  
4 2 factors in patients with heterozygous familial hypercholesterolaemia. *Heart*  
5 3 2004;90(12):1431-37. doi: 10.1136/hrt.2003.022764  
6 4 36. Nenseter MS, Lindvig HW, Ueland T, et al. Lipoprotein (a) levels in coronary heart  
7 5 disease-susceptible and-resistant patients with familial hypercholesterolemia.  
8 6 *Atherosclerosis* 2011;216(2):426-32.  
9 7 37. Alonso R, Andres E, Mata N, et al. Lipoprotein (a) levels in Familial  
10 8 Hipercholesterolaemia: an important predictor for cardiovascular disease  
11 9 independent of the type of LDL-receptor mutation. *J Am Coll Cardiol*  
12 10 2014;63(19):1982-89.  
13 11 38. Allard MD, Saeedi R, Yousefi M, et al. Risk stratification of patients with familial  
14 12 hypercholesterolemia in a multi-ethnic cohort. *Diabetes* 2014;13:65.  
15 13 39. Chan DC, Pang J, Hooper AJ, et al. Elevated lipoprotein(a), hypertension and renal  
16 14 insufficiency as predictors of coronary artery disease in patients with genetically  
17 15 confirmed heterozygous familial hypercholesterolemia. *Int J Cardiol* 2015;201:633-  
18 16 38.  
19 17 40. Ueshima H, Sekikawa A, Miura K, et al. Cardiovascular Disease and Risk Factors in Asia  
20 18 A Selected Review. *Circulation* 2008;118(25):2702-09.  
21 19 41. Jervise L, Hanson M, Bell D, et al. An audit of pharmacists' knowledge of familial  
22 20 hypercholesterolaemia: Implications for community healthcare. *Australian Pharmacist*  
23 21 2013;July:73-75.  
24 22 42. Rangarajan N, Balasubramanian S, Pang J, et al. Knowledge and Awareness of Familial  
25 23 Hypercholesterolaemia among Registered Medical Practitioners in Tamil Nadu: Are  
26 24 They Suboptimal? *Journal of Clinical and Diagnostic Research* 2016;10(5):OC52-56.  
27 25 43. Schofield J, France M, Capps N, et al. Knowledge gaps in the management of familial  
28 26 hypercholesterolaemia. A UK based survey. *Atherosclerosis* 2016;252:161-65.  
29 27 44. Bell DA, Kirke AB, Barbour R, et al. Can Patients be Accurately Assessed for Familial  
30 28 Hypercholesterolaemia in Primary Care? *Heart Lung Circ* 2014;23(12):1153-57.  
31 29 45. Roeters van Lennep JE. Knowledge equals health; why all healthcare professionals  
32 30 should know about familial hypercholesterolemia. *Atherosclerosis* 2016;252:188-89.  
33 31 doi: 10.1016/j.atherosclerosis.2016.07.928  
34 32 46. Vallejo-Vaz AJ, Kondapally Seshasai SR, Cole D, et al. Familial hypercholesterolaemia:  
35 33 A global call to arms. *Atherosclerosis* 2015;243(1):257-59.  
36 34 47. Tai E, Ming Loh L, Sethi SK, et al. MEDPED comes to Singapore. *Atherosclerosis*  
37 35 2001;154(1):252.  
38 36 48. Hu M, Lan W, Lam CW, et al. Heterozygous familial hypercholesterolemia in Hong Kong  
39 37 Chinese. Study of 252 cases. *Int J Cardiol* 2013;167(3):762-7. doi:  
40 38 10.1016/j.ijcard.2012.03.048  
41 39 49. Watts GF, Sullivan DR, Poplawski N, et al. Familial hypercholesterolaemia: A model of  
42 40 care for Australasia. *Atherosclerosis Supplements* 2011;12:221-63. doi:  
43 41 10.1016/j.atherosclerosis.2011.06.001  
44 42 50. Harada-Shiba M, Arai H, Oikawa S, et al. Guidelines for the management of familial  
45 43 hypercholesterolemia. *J Atheroscler Thromb* 2012;19(12):1043-60.  
46 44 51. Shin DG, Han SM, Kim DI, et al. Clinical features of familial hypercholesterolemia in  
47 45 Korea: Predictors of pathogenic mutations and coronary artery disease – A study  
48 46 supported by the Korean Society of Lipidology and Atherosclerosis. *Atherosclerosis*  
49 47 2015;243(1):53-58.  
50 48 52. Civeira F, Castillo S, Alonso R, et al. Tendon xanthomas in familial hypercholesterolemia  
51 49 are associated with cardiovascular risk independently of the low-density lipoprotein  
52 50 receptor gene mutation. *Arterioscler Thromb Vasc Biol* 2005;25(9):1960-65.  
53 51 53. Livy A, Lye SH. Familial hypercholesterolemia in Asia: a review. *Journal of OMICS*  
54 52 *Research* 2011;1(1):22-31.  
55 53 54. Arai H, Ding Y-A, Yamashita S. Impact of the Integrated Guidance on the Care of  
56 54 Familial Hypercholesterolaemia. *J Atheroscler Thromb* 2014;21(4):366-74.

- 1  
2  
3 1 55. Kim H-S, Wu Y, Lin S-J, et al. Current status of cholesterol goal attainment after statin  
4 2 therapy among patients with hypercholesterolemia in Asian countries and region: the  
5 3 Return on Expenditure Achieved for Lipid Therapy in Asia (REALITY-Asia) study.  
6 4 *Curr Med Res Opin* 2008;24(7):1951-63.  
7 5 56. Kamae I. Value-based approaches to healthcare systems and pharmacoeconomics  
8 6 requirements in Asia. *Pharmacoeconomics* 2010;28(10):831-38.  
9 7 57. O'Donnell O, Van Doorslaer E, Rannan-Eliya RP, et al. Who pays for health care in  
10 8 Asia? *J Health Econ* 2008;27(2):460-75.  
11 9 58. Khatib R, McKee M, Shannon H, et al. Availability and affordability of cardiovascular  
12 10 disease medicines and their effect on use in high-income, middle-income, and low-  
13 11 income countries: an analysis of the PURE study data. *The Lancet*  
14 12 2016;387(10013):61-69.  
15 13 59. Ock SM, Choi JY, Cha YS, et al. The Use of Complementary and Alternative Medicine in  
16 14 a General Population in South Korea: Results from a National Survey in 2006. *J*  
17 15 *Korean Med Sci* 2009;24(1):1-6.  
18 16 60. Chen F-P, Chen T-J, Kung Y-Y, et al. Use frequency of traditional Chinese medicine in  
19 17 Taiwan. *BMC Health Serv Res* 2007;7(1):26.  
20 18 61. Vallejo-Vaz AJ, Akram A, Kondapally Seshasai SR, et al. Pooling and expanding  
21 19 registries of familial hypercholesterolaemia to assess gaps in care and improve  
22 20 disease management and outcomes: Rationale and design of the global EAS  
23 21 Familial Hypercholesterolaemia Studies Collaboration. *Atherosclerosis Supplements*  
24 22 2016;22:1-32.  
25  
26  
27  
28  
29  
30  
31  
32  
33  
34  
35  
36  
37  
38  
39  
40  
41  
42  
43  
44  
45  
46  
47  
48  
49  
50  
51  
52  
53  
54  
55  
56  
57  
58  
59  
60



STROBE 2007 (v4) Statement—Checklist of items that should be included in reports of cross-sectional studies

| Section/Topic             | Item # | Recommendation                                                                                                                                                                       | Reported on page # |
|---------------------------|--------|--------------------------------------------------------------------------------------------------------------------------------------------------------------------------------------|--------------------|
| Title and abstract        | 1      | (a) Indicate the study’s design with a commonly used term in the title or the abstract                                                                                               | 3                  |
|                           |        | (b) Provide in the abstract an informative and balanced summary of what was done and what was found                                                                                  | 3                  |
| <b>Introduction</b>       |        |                                                                                                                                                                                      |                    |
| Background/rationale      | 2      | Explain the scientific background and rationale for the investigation being reported                                                                                                 | 5                  |
| Objectives                | 3      | State specific objectives, including any prespecified hypotheses                                                                                                                     | 5                  |
| <b>Methods</b>            |        |                                                                                                                                                                                      |                    |
| Study design              | 4      | Present key elements of study design early in the paper                                                                                                                              | 5                  |
| Setting                   | 5      | Describe the setting, locations, and relevant dates, including periods of recruitment, exposure, follow-up, and data collection                                                      | 5-6                |
| Participants              | 6      | (a) Give the eligibility criteria, and the sources and methods of selection of participants                                                                                          | 5-6                |
| Variables                 | 7      | Clearly define all outcomes, exposures, predictors, potential confounders, and effect modifiers. Give diagnostic criteria, if applicable                                             | 5-6                |
| Data sources/ measurement | 8*     | For each variable of interest, give sources of data and details of methods of assessment (measurement). Describe comparability of assessment methods if there is more than one group | 5-6                |
| Bias                      | 9      | Describe any efforts to address potential sources of bias                                                                                                                            | 4                  |
| Study size                | 10     | Explain how the study size was arrived at                                                                                                                                            | 4                  |
| Quantitative variables    | 11     | Explain how quantitative variables were handled in the analyses. If applicable, describe which groupings were chosen and why                                                         | 6                  |
| Statistical methods       | 12     | (a) Describe all statistical methods, including those used to control for confounding                                                                                                | 6                  |
|                           |        | (b) Describe any methods used to examine subgroups and interactions                                                                                                                  | 6                  |
|                           |        | (c) Explain how missing data were addressed                                                                                                                                          | N/A                |
|                           |        | (d) If applicable, describe analytical methods taking account of sampling strategy                                                                                                   | N/A                |
|                           |        | (e) Describe any sensitivity analyses                                                                                                                                                | N/A                |
| <b>Results</b>            |        |                                                                                                                                                                                      |                    |

1  
2  
3  
4  
5  
6  
7  
8  
9  
10  
11  
12  
13  
14  
15  
16  
17  
18  
19  
20  
21  
22  
23  
24  
25  
26  
27  
28  
29  
30  
31  
32  
33  
34  
35  
36  
37  
38  
39  
40  
41  
42  
43  
44  
45  
46  
47  
48  
49

|                          |     |                                                                                                                                                                                                              |        |
|--------------------------|-----|--------------------------------------------------------------------------------------------------------------------------------------------------------------------------------------------------------------|--------|
| Participants             | 13* | (a) Report numbers of individuals at each stage of study—eg numbers potentially eligible, examined for eligibility, confirmed eligible, included in the study, completing follow-up, and analysed            | N/A    |
|                          |     | (b) Give reasons for non-participation at each stage                                                                                                                                                         | N/A    |
|                          |     | (c) Consider use of a flow diagram                                                                                                                                                                           | N/A    |
| Descriptive data         | 14* | (a) Give characteristics of study participants (eg demographic, clinical, social) and information on exposures and potential confounders                                                                     | 6 & 15 |
|                          |     | (b) Indicate number of participants with missing data for each variable of interest                                                                                                                          | N/A    |
| Outcome data             | 15* | Report numbers of outcome events or summary measures                                                                                                                                                         | N/A    |
| Main results             | 16  | (a) Give unadjusted estimates and, if applicable, confounder-adjusted estimates and their precision (eg, 95% confidence interval). Make clear which confounders were adjusted for and why they were included | 17     |
|                          |     | (b) Report category boundaries when continuous variables were categorized                                                                                                                                    | N/A    |
|                          |     | (c) If relevant, consider translating estimates of relative risk into absolute risk for a meaningful time period                                                                                             | N/A    |
| Other analyses           | 17  | Report other analyses done—eg analyses of subgroups and interactions, and sensitivity analyses                                                                                                               | N/A    |
| <b>Discussion</b>        |     |                                                                                                                                                                                                              |        |
| Key results              | 18  | Summarise key results with reference to study objectives                                                                                                                                                     | 8-10   |
| Limitations              | 19  | Discuss limitations of the study, taking into account sources of potential bias or imprecision. Discuss both direction and magnitude of any potential bias                                                   | 4 & 10 |
| Interpretation           | 20  | Give a cautious overall interpretation of results considering objectives, limitations, multiplicity of analyses, results from similar studies, and other relevant evidence                                   | 12     |
| Generalisability         | 21  | Discuss the generalisability (external validity) of the study results                                                                                                                                        | 10-11  |
| <b>Other information</b> |     |                                                                                                                                                                                                              |        |
| Funding                  | 22  | Give the source of funding and the role of the funders for the present study and, if applicable, for the original study on which the present article is based                                                | 13     |

\*Give information separately for cases and controls in case-control studies and, if applicable, for exposed and unexposed groups in cohort and cross-sectional studies.

**Note:** An Explanation and Elaboration article discusses each checklist item and gives methodological background and published examples of transparent reporting. The STROBE checklist is best used in conjunction with this article (freely available on the Web sites of PLoS Medicine at <http://www.plosmedicine.org/>, Annals of Internal Medicine at <http://www.annals.org/>, and Epidemiology at <http://www.epidem.com/>). Information on the STROBE Initiative is available at [www.strobe-statement.org](http://www.strobe-statement.org).

# BMJ Open

## An Enquiry based on a Standardised Questionnaire into Knowledge, Awareness and Preferences concerning the Care of Familial Hypercholesterolemia among Primary Care Physicians in the Asia-Pacific region: The "Ten Countries Study"

|                               |                                                                                                                                                                                                                                                                                                                                                                                                                                                                                                                                                                                                                                                                                                                                                                                                                                                                                                                                                                                                                                                                                                                                                                                                                                                                                                                                                                                                                                                                                                                                                                                                                                                                                                                                                                                                                                                                                                                                                                                                                                                                                                                                                                                                                                                                                                       |
|-------------------------------|-------------------------------------------------------------------------------------------------------------------------------------------------------------------------------------------------------------------------------------------------------------------------------------------------------------------------------------------------------------------------------------------------------------------------------------------------------------------------------------------------------------------------------------------------------------------------------------------------------------------------------------------------------------------------------------------------------------------------------------------------------------------------------------------------------------------------------------------------------------------------------------------------------------------------------------------------------------------------------------------------------------------------------------------------------------------------------------------------------------------------------------------------------------------------------------------------------------------------------------------------------------------------------------------------------------------------------------------------------------------------------------------------------------------------------------------------------------------------------------------------------------------------------------------------------------------------------------------------------------------------------------------------------------------------------------------------------------------------------------------------------------------------------------------------------------------------------------------------------------------------------------------------------------------------------------------------------------------------------------------------------------------------------------------------------------------------------------------------------------------------------------------------------------------------------------------------------------------------------------------------------------------------------------------------------|
| Journal:                      | <i>BMJ Open</i>                                                                                                                                                                                                                                                                                                                                                                                                                                                                                                                                                                                                                                                                                                                                                                                                                                                                                                                                                                                                                                                                                                                                                                                                                                                                                                                                                                                                                                                                                                                                                                                                                                                                                                                                                                                                                                                                                                                                                                                                                                                                                                                                                                                                                                                                                       |
| Manuscript ID                 | bmjopen-2017-017817.R1                                                                                                                                                                                                                                                                                                                                                                                                                                                                                                                                                                                                                                                                                                                                                                                                                                                                                                                                                                                                                                                                                                                                                                                                                                                                                                                                                                                                                                                                                                                                                                                                                                                                                                                                                                                                                                                                                                                                                                                                                                                                                                                                                                                                                                                                                |
| Article Type:                 | Research                                                                                                                                                                                                                                                                                                                                                                                                                                                                                                                                                                                                                                                                                                                                                                                                                                                                                                                                                                                                                                                                                                                                                                                                                                                                                                                                                                                                                                                                                                                                                                                                                                                                                                                                                                                                                                                                                                                                                                                                                                                                                                                                                                                                                                                                                              |
| Date Submitted by the Author: | 03-Jul-2017                                                                                                                                                                                                                                                                                                                                                                                                                                                                                                                                                                                                                                                                                                                                                                                                                                                                                                                                                                                                                                                                                                                                                                                                                                                                                                                                                                                                                                                                                                                                                                                                                                                                                                                                                                                                                                                                                                                                                                                                                                                                                                                                                                                                                                                                                           |
| Complete List of Authors:     | <p>Pang, Jing; University of Western Australia, School of Medicine, Faculty of Health and Medical Sciences</p> <p>Hu, Miao; The Chinese University of Hong Kong, Department of Medicine and Therapeutics</p> <p>Lin, Jie; Beijing Anzhen Hospital, Capital Medical University - Beijing Institute of Heart, Lung and Blood Vessel Diseases</p> <p>Miida, Takashi; Juntendo University, Department of Clinical Laboratory Medicine, Graduate School of Medicine</p> <p>Nawawi, Hapizah; Universiti Teknologi MARA, Institute for Pathology, Laboratory and Forensic Medicine (I-PPerForM) and Disciplines of Chemical Pathology and Primary Care, Faculty of Medicine</p> <p>Park, Jeong Euy; Sungkyunkwan University School of Medicine, Division of Cardiology, Samsung Medical Center</p> <p>Wu, Xue; Beijing Anzhen Hospital, Capital Medical University - Beijing Institute of Heart, Lung and Blood Vessel Diseases</p> <p>Ramli, Anis Safura; Universiti Teknologi MARA, Institute for Pathology, Laboratory and Forensic Medicine (I-PPerForM) and Disciplines of Chemical Pathology and Primary Care, Faculty of Medicine</p> <p>Kim, Ngoc Thanh; Hanoi Medical University; Vietnam National Heart Institute, Bach Mai Hospital</p> <p>Kwok, See; University of Manchester, Institute of Human Development; The Old St Mary's Hospital, Cardiovascular Trials Unit, Central Manchester University Hospital NHS Foundation Trust</p> <p>Gonzales, Lourdes Ella; UP-Philippine General Hospital, Section of Preventive Cardiology, Department of Cardiology</p> <p>Su, Ta-Chen; National Taiwan University Hospital, Department of Internal Medicine and Cardiovascular Center</p> <p>Truong, Thanh Huong; Hanoi Medical University; Vietnam National Heart Institute, Bach Mai Hospital</p> <p>Soran, H; Cardiovascular Research Group, University of Manchester; Cardiovascular Trials Unit, Central Manchester University Hospitals</p> <p>Yamashita, Shizuya; Osaka University Graduate School of Medicine, Departments of Cardiovascular Medicine and Community; Rinku General Medical Center</p> <p>Tomlinson, Brian; The Chinese University of Hong Kong, Department of Medicine and Therapeutics</p> <p>Watts, Gerald; University of Western Australia, School of Medicine, Faculty</p> |

1  
2  
3  
4  
5  
6  
7  
8  
9  
10  
11  
12  
13  
14  
15  
16  
17  
18  
19  
20  
21  
22  
23  
24  
25  
26  
27  
28  
29  
30  
31  
32  
33  
34  
35  
36  
37  
38  
39  
40  
41  
42  
43  
44  
45  
46  
47  
48  
49  
50  
51  
52  
53  
54  
55  
56  
57  
58  
59  
60

|                                    |                                                                                                        |
|------------------------------------|--------------------------------------------------------------------------------------------------------|
|                                    | of Health and Medical Sciences; Royal Perth Hospital, Lipid Disorders Clinic, Department of Cardiology |
| <b>Primary Subject Heading</b> :   | Cardiovascular medicine                                                                                |
| <b>Secondary Subject Heading</b> : | Evidence based practice, Communication, Health services research, Public health                        |
| <b>Keywords</b> :                  | familial hypercholesterolaemia, awareness, knowledge, practices, Asia-Pacific, physicians              |
|                                    |                                                                                                        |

SCHOLARONE™  
Manuscripts

For peer review only

1  
2  
3  
4  
5  
6  
7  
8  
9  
10  
11  
12  
13  
14  
15  
16  
17  
18  
19  
20  
21  
22  
23  
24  
25  
26  
27  
28  
29  
30  
31  
32  
33  
34  
35  
36  
37  
38  
39  
40  
41  
42  
43  
44  
45  
46  
47  
48  
49  
50  
51  
52  
53  
54  
55  
56  
57  
58  
59  
60

1  
2  
3  
4  
5  
6  
7  
8  
9  
10  
11  
12  
13  
14  
15  
16  
17  
18  
19  
20  
21  
22  
23  
24  
25  
26  
27  
28  
29  
30  
31  
32  
33  
34  
35  
36  
37  
38  
39  
40  
41  
42  
43  
44  
45  
46  
47  
48  
49  
50  
51  
52  
53  
54  
55  
56  
57  
58  
59  
60

**An Enquiry based on a Standardised Questionnaire into Knowledge, Awareness and Preferences concerning the Care of Familial Hypercholesterolemia among Primary Care Physicians in the Asia-Pacific region: The “Ten Countries Study”**

Jing Pang<sup>1</sup>, Miao Hu<sup>2</sup>, Jie Lin<sup>3</sup>, Takashi Miida<sup>4</sup>, Hapizah M Nawawi<sup>5</sup>, Jeong Euy Park<sup>6</sup>, Xue Wu<sup>3</sup>, Anis S Ramli<sup>5</sup>, Ngoc Thanh Kim<sup>7,8</sup>, See Kwok<sup>9,10</sup>, Lourdes E Gonzalez-Santos<sup>11</sup>, Ta-Chen Su<sup>12</sup>, Thanh Huong Truong<sup>7,8</sup>, Handrean Soran<sup>10</sup>, Shizuya Yamashita<sup>13,14</sup>, Brian Tomlinson<sup>2</sup> and Gerald F Watts<sup>1,15</sup>

<sup>1</sup>School of Medicine, Faculty of Health and Medical Sciences, University of Western Australia, Perth, Western Australia, Australia

<sup>2</sup>Department of Medicine and Therapeutics, The Chinese University of Hong Kong, Shatin, Hong Kong SAR

<sup>3</sup>Department of Atherosclerosis, Beijing Anzhen Hospital, Capital Medical University - Beijing Institute of Heart, Lung and Blood Vessel Diseases, Beijing, China

<sup>4</sup>Department of Clinical Laboratory Medicine, Graduate School of Medicine, Juntendo University, Tokyo, Japan

<sup>5</sup>Institute for Pathology, Laboratory and Forensic Medicine (I-PPerForM) and Disciplines of Chemical Pathology and Primary Care, Faculty of Medicine, Universiti Teknologi MARA, Sungai Buloh, Selangor, Malaysia

<sup>6</sup>Division of Cardiology, Samsung Medical Center, Sungkyunkwan University School of Medicine, Seoul, South Korea

<sup>7</sup>Hanoi Medical University, Hanoi, Vietnam

<sup>8</sup>Vietnam National Heart Institute, Bach Mai Hospital, Hanoi, Vietnam.

<sup>9</sup>University of Manchester, Institute of Human Development, Manchester, United Kingdom

<sup>10</sup>Cardiovascular Trials Unit, The Old St Mary's Hospital, Central Manchester University Hospital NHS Foundation Trust, Manchester, United Kingdom

<sup>11</sup>Section of Preventive Cardiology, Department of Cardiology, UP-Philippine General Hospital, Manila, Philippines

<sup>12</sup>Department of Internal Medicine and Cardiovascular Center, National Taiwan University Hospital, Taipei, Taiwan

<sup>13</sup>Departments of Cardiovascular Medicine and Community Medicine, Osaka University Graduate School of Medicine, Osaka, Japan

<sup>14</sup>Rinku General Medical Center, Osaka, Japan

<sup>15</sup>Lipid Disorders Clinic, Department of Cardiology, Royal Perth Hospital, Perth, Western Australia, Australia

**Word count:** 3,126; **Tables:** 2

**Keywords:** familial hypercholesterolaemia, awareness, knowledge, practices, perception, Asia-Pacific, physicians, models of care

**Corresponding author:**

Professor Gerald F Watts

Postal address: GPO Box X2213 Perth WA 6847 Australia

Phone: +61 8 9224 0245

Email: [gerald.watts@uwa.edu.au](mailto:gerald.watts@uwa.edu.au)

1  
2  
3  
4  
5  
6  
7  
8  
9  
10  
11  
12  
13  
14  
15  
16  
17  
18  
19  
20  
21  
22  
23  
24  
25  
26  
27  
28  
29  
30  
31  
32  
33  
34  
35  
36  
37  
38  
39  
40  
41  
42  
43  
44  
45  
46  
47  
48  
49  
50  
51  
52  
53  
54  
55  
56  
57  
58  
59  
60

1 The Corresponding Author has the right to grant on behalf of all authors and does  
2 grant on behalf of all authors, an exclusive licence (or non-exclusive for government  
3 employees) on a worldwide basis to the BMJ Publishing Group Ltd to permit this  
4 article (if accepted) to be published in BMJ editions and any other BMJ PGL products  
5 and sublicences such use and exploit all subsidiary rights, as set out in our licence.

For peer review only

1  
2  
3 **1 ABSTRACT**

4  
5 **2 Objective:** To determine physicians' knowledge, awareness and preferences  
6  
7 regarding the care of familial hypercholesterolaemia (FH) in the Asia-Pacific region.  
8

9  
10 **4 Setting:** A formal questionnaire was anonymously completed by physicians from  
11  
12 different countries/regions in the Asia-Pacific. The survey sought responses relating  
13  
14 to general familiarity, awareness of management guidelines, identification (clinical  
15  
16 characteristics and lipid profile), prevalence and inheritance, extent of elevation in  
17  
18 risk of cardiovascular disease (CVD), and practice on screening and treatment.

19  
20 **9 Participants:** Practising community physicians from Australia, Japan, Malaysia,  
21  
22 South Korea, Philippines, Hong Kong, China, Vietnam and Taiwan were recruited to  
23  
24 complete the questionnaire, with the United Kingdom as the international  
25  
26 benchmark.

27  
28 **13 Primary outcome:** An assessment and comparison of the knowledge, awareness  
29  
30 and preferences of FH among physicians in ten different countries/regions.

31  
32 **15 Results:** 1,078 physicians completed the questionnaire from the Asia-Pacific region;  
33  
34 only 34% considered themselves to be familiar with FH. 72% correctly described FH  
35  
36 and 65% identified the typical lipid profile, with a higher proportion of physicians from  
37  
38 Japan and China selecting the correct FH definition and lipid profile compared with  
39  
40 those from Vietnam and Philippines. However, less than half of the physician were  
41  
42 aware of national or international management guidelines; this was significantly  
43  
44 worse than physicians from the United Kingdom (35% vs 61%,  $p < 0.001$ ). Knowledge  
45  
46 of prevalence (24%), inheritability (41%), and CVD risk (9%) of FH were also  
47  
48 suboptimal. The majority of the physicians considered laboratory interpretative  
49  
50 commenting as being useful (81%) and statin therapy as an appropriate cholesterol-  
51  
52 lowering therapy (89%) for FH management.

53  
54 **26 Conclusions:** The study identified important gaps, which are readily addressable, in  
55  
56 the awareness and knowledge of FH among physicians in the region.  
57  
58 Implementation of country-specific guidelines and extensive work in FH education  
59  
60 and awareness programs are imperative to improve the care of FH in the region.

1  
2  
3  
4  
5  
6  
7  
8  
9  
10  
11  
12  
13  
14  
15  
16  
17  
18  
19  
20  
21  
22  
23  
24  
25  
26  
27  
28  
29  
30  
31  
32  
33  
34  
35  
36  
37  
38  
39  
40  
41  
42  
43  
44  
45  
46  
47  
48  
49  
50  
51  
52  
53  
54  
55  
56  
57  
58  
59  
60

## 1 Strengths and limitations of this study

- 2 • The study is a large-scale multi-national survey assessing FH knowledge and  
3 management gaps across ten different countries/regions, with over 1000  
4 physicians completing the questionnaire.
- 5 • The standardised questionnaire has been previously tested and employed in  
6 primary care in Australia and the United Kingdom.
- 7 • The self-selected group that responded to the questionnaire may reflect those  
8 with more interest and knowledge in lipid disorders.
- 9 • Since the survey was conducted anonymously, there was no specific  
10 information of responders and non-responders.
- 11 • The questionnaire employed did not cover all aspects of the care of FH, such  
12 as use of genetic testing and assessment of other cardiovascular risk factors.
- 13 • The analysis assumed that the primary care physicians from the United  
14 Kingdom were the gold standard respondents.

15



## 1 INTRODUCTION

2 Familial hypercholesterolaemia (FH) is characterised by elevated low-density  
3 lipoprotein cholesterol (LDL-C) levels owing to mutations in the low-density  
4 lipoprotein receptor (LDLr) pathway. FH is the most common inherited lipid disorder  
5 that accelerates atherosclerotic cardiovascular disease (CVD). However, the majority  
6 of people with FH are undiagnosed and undertreated<sup>1</sup>. FH is a public health problem  
7 throughout the world. The prevalence of heterozygous FH is estimated to be 1 in 200  
8 to 1 in 500<sup>2-6</sup> in unselected community populations, with an estimated 3.6 million  
9 individuals in the Asia-Pacific region alone<sup>7</sup> and less than 1% are considered to be  
10 formally diagnosed in the region<sup>8 9</sup>. FH healthcare in the region leaves much to be  
11 desired.

12 Primary care physicians (PCPs) or family doctors are well placed in the community  
13 to opportunistically detect FH<sup>10 11</sup> and need to be involved in the care of these  
14 patients. The role of primary care in the care of FH has not been adequately defined  
15 and our preliminary data suggest a significant shortfall in knowledge and awareness  
16 among family doctors<sup>7 12</sup>. As part of the “Ten Countries Study”<sup>13</sup>, we investigated  
17 several aspects of the knowledge, awareness and preferences of FH among PCPs  
18 in ten countries/regions, primarily in the Asia-Pacific Region.

## 19 METHODS

20 The methodology for the present study has been previously described as part of the  
21 overarching “Ten Countries Study”<sup>13</sup>, a project investigating several aspects of the  
22 care of FH. The United Kingdom, a country with a highly developed healthcare  
23 system and a sophisticated guideline for the care of FH developed by the National  
24 Institute for Health and Care Excellence (NICE)<sup>14</sup>, was included to provide the  
25 international benchmark. Since this was an anonymous quality assurance enquiry  
26 into clinical practice, formal ethics approval was not required and this was verified by  
27 the local ethics committee.

28 In brief, a formal questionnaire was offered to PCPs via cardiovascular education  
29 sessions, conferences and/or mail lists from the country-equivalent Royal Colleges.  
30 Language-specific versions of the questionnaire were developed from the English-  
31 language version via standardised back-translation techniques and the aid of

1 bilingual translators. The survey inquired about the following aspects of FH:  
2 familiarity with the condition, awareness of national and international guidelines for  
3 FH; the clinical description of FH; identification of the typical lipid profile; prevalence  
4 and inheritance of FH; extent of elevation in risk of CVD, whether the diagnosis  
5 requires genetic confirmation; methods for alerting PCPs about the possibility of FH;  
6 type of health professional best placed to detect FH; number of patients with FH  
7 currently being treated; specific treatments; knowledge and practices concerning  
8 family screening; treatment and referral practices regarding patients with severely  
9 elevated cholesterol. Demographic data were also recorded.

10 Between March 2014 and August 2016, the survey was completed voluntarily and  
11 anonymously among physicians in nine countries and/or regions in Asia-Pacific  
12 (Australia, Japan, Malaysia, South Korea, Philippines, Hong Kong, China, Vietnam  
13 and Taiwan), as well as the United Kingdom<sup>15</sup>. Results from the PCPs surveyed in  
14 the United Kingdom have been published<sup>15</sup>; the details of the survey are available in  
15 the supplementary appendix. Data were analysed using STATA 12 (StataCorp). Chi-  
16 squared tests were performed to compare the Asia-Pacific PCPs to the United  
17 Kingdom. The survey responses from each country/region was compared to the  
18 United Kingdom, as the reference group. The differences were investigated using  
19 logistic regression analyses. Significance was defined at the 5% level.

## 20 RESULTS

21 1,335 physicians completed the questionnaire; 257 physicians declared themselves  
22 to be specialist physicians and were excluded from the study. 1,078 PCPs from  
23 Australia (n=151), Japan (n=197), Malaysia (n=219), South Korea (n=97),  
24 Philippines (n=62), Hong Kong (n=59), China (n=118), Vietnam (n=137) and Taiwan  
25 (n=38) were included in the study. 54% of the respondents were male. There were a  
26 greater proportion of male respondents from Japan (84%) and South Korea (81%)  
27 compared with Malaysia (24%) and the Philippines (37%). Overall, practice location  
28 was spread over urban/metropolitan (63%), suburban/outer metropolitan (17%) and  
29 rural (20%) areas. Respondents from Hong Kong and Taiwan were all based in  
30 urban/metropolitan areas, possibly owing to the small size of their regions  
31 (<40,000km<sup>2</sup>). Table 1 details the demographics of the PCPs from the individual

1 countries/regions and their knowledge, awareness and preferences regarding FH.  
2 100 PCPs from the United Kingdom were the comparator group.

3 A third of PCPs from Asia-Pacific rated their familiarity with FH as above average  
4 (>4, from a scale of 1 to 7). Although self-perceived familiarity with FH was not  
5 significantly different among most countries (except lower in Japan and China) and  
6 the United Kingdom, awareness of FH guidelines was significantly lower in Asia-  
7 Pacific compared with the United Kingdom (35% vs 61%,  $p<0.001$ ). Similarly, the  
8 awareness of lipid specialists for referral or medical advice was significantly lower in  
9 Asia-Pacific compared with the United Kingdom (35% vs 50%,  $p=0.003$ ); only  
10 Australian and Taiwanese PCPs were comparably aware. Regarding the knowledge  
11 of FH, PCPs from the United Kingdom were significantly better at selecting the  
12 correct FH description (89% vs 72%,  $p=0.001$ ) compared with the Asia-Pacific PCPs.

13 Table 2 details the comparison of PCP's responses to questions about FH  
14 awareness, knowledge, practices and preferences with the United Kingdom as the  
15 reference group. In spite of the lower self-perceived familiarity with FH, Japanese  
16 and Chinese physicians were significantly better at identifying the correct FH lipid  
17 profile, compared with the United Kingdom. The response to questions concerning  
18 the prevalence, inheritance and CVD risk of FH were suboptimal in all  
19 countries/regions, and particularly in China and Vietnam. Half of the PCPs correctly  
20 identified that genetic testing was not required to accurately diagnose FH. The  
21 majority of PCPs selected statins as the best pharmacotherapy to best treat  
22 hypercholesterolaemia, with a significantly lower proportion of PCPs selecting this  
23 from Japan and Vietnam, compared with the United Kingdom. Half of the PCPs  
24 selected the combination of statin and ezetimibe to treat severe  
25 hypercholesterolemia, with a significantly higher proportion of PCPs selecting this  
26 from Australia, South Korea and China, compared with the United Kingdom.

27 Concerning practices relating to FH, PCPs from the Asia-Pacific region and the  
28 United Kingdom were equally likely to screen patients with premature CAD for their  
29 family history of CVD. Of PCPs who had FH patients under their care, 66% from  
30 Asia-Pacific and 73% the United Kingdom responded that they would perform routine  
31 screening of their family members and there was no significant difference. However,  
32 Japanese PCPs caring for FH patients were the lowest who would undertake family

1 screening among the countries/regions. The most prevalent age for screening young  
2 people in a kindred with FH was selected at 13-18 years. Although awareness of  
3 lipid specialists were suboptimal, in PCPs that were aware of lipid specialists, only  
4 56% had referred FH patients to a lipid specialist in the Asia-Pacific region,  
5 compared with 72% in the United Kingdom which was significantly higher ( $p=0.028$ );  
6 Japan, Philippines, Vietnam and Malaysia were particularly low.

7 The majority of PCPs from the United Kingdom (82%) selected themselves as the  
8 most effective health care provider for the early detection of FH. However, the  
9 response was highly disparate in the Asia-Pacific region, with only 8% of responses  
10 from China and 23% from Vietnam identifying PCPs as the preferred health care  
11 provider for the early detection of FH. By contrast, 92% of from Malaysia and 80%  
12 from Australia, selected PCPs (Table 1). Overall, cardiologists (38%), lipid specialists  
13 (36%) and endocrinologists (10%) were also selected by the PCPs from the Asia-  
14 Pacific. However, PCPs did not consider that there was a significant role for  
15 paediatricians, obstetricians/gynaecologists and/or nurses with cardiac training in the  
16 care of FH. The majority of PCPs selected an interpretive laboratory comment on  
17 lipid test report results as being useful in detecting FH.

## 18 **DISCUSSION**

19 Recent knowledge of the population frequency of FH suggests that it can be viewed  
20 as a public health problem. Strategies for improving early diagnosis and care of FH  
21 in the community requires adequate knowledge and appropriate practices  
22 concerning this condition. This study is the first survey to demonstrate significant  
23 gaps in knowledge and awareness of FH across several countries/regions in the  
24 Asia-Pacific and to identify important areas of deficit.

25 In the present study, the lack of awareness of guidelines and lipid specialists can be  
26 related to the lack of country-specific guidelines<sup>16</sup> on FH and the lack of physicians  
27 specifically trained and practicing as lipid experts in the region. Although the UK  
28 performed significantly better on these questions compared with the  
29 countries/regions in the Asia-Pacific, the results were still suboptimal. 39% were  
30 unaware of FH guidelines despite the fact that the NICE guidelines for identifying FH  
31 were released 7-8 years ago, and 50% were not aware of a lipid specialist in spite of  
32 the efforts from Heart UK in mapping specialist lipid clinics and establishing an FH

1  
2  
3 1 Intelligence Network. Lack of awareness of clinical services for lipid disorders may  
4 be because specialist services do not exist in their geographical area, particularly for  
5 PCPs practising in suburban and rural regions, which constituted 43% of the PCPs  
6 surveyed.  
7  
8

9  
10 5 The PCPs were generally able to correctly define FH. However, knowledge of FH  
11 prevalence, heritability and risk of CVD were suboptimal. Three quarters of PCPs in  
12 the present study were not aware of the theoretical prevalence of FH of 1:500 (with  
13 42% selecting 'don't know') and 91% were not aware of the >20-fold risk of CVD in  
14 untreated FH<sup>17</sup> (with 30% selecting 'don't know'). However, as demonstrated by  
15 recent studies, heterozygous FH may be more common than 1:500<sup>2-6</sup> and given the  
16 sparse prevalence data from the region and the exceptionally high prevalence  
17 reported in the Hokuriku district of Japan<sup>18</sup>, the true prevalence of FH in the region is  
18 undefined. Additionally, CVD risk could be ~10-fold<sup>19</sup> and the relative risk of CVD  
19 with FH also varies significantly by age. Taking this into account, 45% of  
20 respondents identified the prevalence as between 1:100-1:1000 and 60% selected  
21 CVD risk to be 5-20 times greater. Although still suboptimal, this at least indicates an  
22 understanding that the risk of CVD is high among patients with FH.  
23  
24

25  
26 18 Knowledge and familiarity with lipid-lowering treatment was reassuring; most PCPs  
27 identified statins to best treat hypercholesterolaemia. A lower proportion of  
28 physicians from Japan and Vietnam selected statins, which may relate to the  
29 availability of alternative medication (eg. probucol) and the lack of access to statins  
30 in some regions. Owing to the severity of hypercholesterolaemia, most FH patients  
31 will require additional therapy to reach treatment goals<sup>1</sup>. PCPs from China, South  
32 Korea and Australia were particularly good at selecting combination statin and  
33 ezetimibe therapy for treating severe hypercholesterolaemia. By contrast, selection of  
34 combination statin and ezetimibe therapy in Vietnam was low and this may relate to  
35 the lack of general access to pharmacotherapies.  
36  
37

38  
39 28 PCPs are critical in achieving long-term treatment adherence and have a key role in  
40 recognising family history of premature CAD. An accurate family history is integral to  
41 both CVD risk assessment and the diagnosis of FH. Encouragingly, 90% of PCPs  
42 would take a detailed family history in patients with premature CAD. However, there  
43 were gaps in cascade screening of close relatives, especially in Japan. Although the  
44  
45  
46  
47  
48  
49  
50  
51  
52  
53  
54  
55  
56  
57  
58  
59  
60

1  
2  
3 1 European guidelines suggest screening of children in an FH kindred from the age of  
4 2 5 years<sup>20</sup> and the NICE guidelines recommend screening children between 2-10  
5 3 years, PCPs in the Asia-Pacific region considered that testing between 13-18 years  
6 4 of age was a more appropriate practice. Studies on cholesterol screening in US  
7 5 paediatricians raised concerns regarding conflicting guidelines on lipid screening and  
8 6 treatment practices<sup>21</sup> and half of the paediatricians were opposed to the use of lipid-  
9 7 lowering therapies in children<sup>21 22</sup>.

10  
11 8 Differences in the choice of healthcare professional perceived as best suited for  
12 9 managing FH and family screening among the countries/regions may reflect different  
13 10 healthcare systems. In particular, 83% of Chinese PCPs considered that lipid  
14 11 specialists were better suited to manage FH. There was the view that cardiologists  
15 12 are well positioned to identify index cases with FH presenting with coronary events<sup>23</sup>  
16 13 <sup>24</sup>. Similarly, endocrinologists were considered well placed to identify FH in a  
17 14 secondary prevention setting. Overall, respondents in the present study considered  
18 15 that PCPs were best situated to identify FH in the primary prevention setting. Few  
19 16 considered that there was a significant role for nurses. This differs from the  
20 17 Netherlands<sup>25</sup> where screening programs have been conducted by nursing and/or  
21 18 allied health staff. Screening may also be undertaken in a non-medical context such  
22 19 as workplace and schools; this option was not specifically enquired for in the present  
23 20 survey. Further exploration of health services and systems are warranted to optimise  
24 21 country-specific clinical service models and integration of care<sup>1</sup>.

25  
26  
27 22 The majority of PCPs in the present study thought that interpretative commenting  
28 23 attached to the reports on lipid profiles in people at high-risk of FH would be useful.  
29 24 This mode of alerting could play a role in the detection and management of FH<sup>26</sup>.  
30 25 Electronic screening tools to retrospectively identify FH in general practices could  
31 26 also be useful; some preliminary work from the United Kingdom and Australia has  
32 27 demonstrated the potential to increase identification of FH via this method<sup>27-29</sup>. Other  
33 28 methods such as screening via the laboratory<sup>30 31</sup> and improving communication  
34 29 between the requesting physician and the chemical pathologist<sup>32</sup> may also be useful.  
35 30 Implementing these in service mode will require an integrated collaborative approach  
36 31 with local laboratories, pathologists and treating physicians.

1  
2  
3 1 Increased lipoprotein(a), smoking, hypertension and diabetes are all known to  
4 2 compound CVD risk and are predictors of CAD in FH<sup>33-40</sup>. A limitation of the present  
5 3 survey was that CVD risk factors were not explored, particularly with the increasing  
6 4 prevalence of risk factors in Asia<sup>41</sup>. The use of genetic testing was also not explored.  
7 5 Other limitation of the study may be the self-selected group that responded to the  
8 6 questionnaire and may reflect those with more interest and knowledge in lipid  
9 7 disorders; the present study may not have captured the widest gaps in knowledge  
10 8 and awareness of FH. Since the survey was conducted anonymously, there was no  
11 9 recorded information on responders and non-responders. The analyses also  
12 10 assumed that the United Kingdom PCPs were the gold standard responders and  
13 11 since the United Kingdom was the only country to administer the questionnaire via  
14 12 an online survey and mailing list, this may have biased responses. The  
15 13 generalisability of our results is constrained by the characteristics of the sample  
16 14 population. Extended enquires before and after education are required in the field.  
17 15 Given that primary care also involves other health professionals, such as practice  
18 16 nurses and allied health professionals, future studies should also be directed at  
19 17 these groups.

20 18 Similar surveys have been undertaken in PCPs<sup>12</sup> and pharmacists<sup>42</sup> in Western  
21 19 Australia, cardiologists in the US<sup>24</sup> and physicians in India<sup>43</sup>, as well as a pilot study  
22 20 among physicians in Japan, South Korea, Taiwan<sup>7</sup>. Knowledge shortfalls were  
23 21 comparable, with underestimations of prevalence, heritability and CVD risk. A  
24 22 recent study by *Schofield et al*<sup>44</sup> assessed FH knowledge among a diverse group of  
25 23 health care professionals (including nurses and pharmacists in the United Kingdom  
26 24 and demonstrated knowledge gaps in FH prevalence, diagnostic criteria and  
27 25 treatment options. In a smaller cohort (n=35) of health care professionals that  
28 26 completed a second survey following an FH education session, all aspects of FH  
29 27 knowledge was improved. *Bell et al*<sup>45</sup> have also shown that with direct education,  
30 28 PCPs are able to accurately assess FH. This emphasises the important of investing  
31 29 in FH education programs<sup>46</sup>. A global initiative, the European Atherosclerosis Society  
32 30 FH Studies Collaboration was launched with aims to disseminate information to  
33 31 empower the medical and lay community to seek changes to improve the care of  
34 32 patients and families with FH<sup>47</sup>. Education programs in medical schools<sup>48</sup> and  
35 33 accredited courses with continuing professional development points could be useful.

1  
2  
3 1 General media (newspaper, health magazines, television and radio), social media,  
4 and patient support groups can be utilised to educate the lay community. The  
5  
6 2 and patient support groups can be utilised to educate the lay community. The  
7 effectiveness of teaching and learning programs require prospective audits and  
8  
9 3 ultimately their impact needs to be gauged with defined outcomes in practices, such  
10 as the number of new cases of FH detected, commenced on statins and the  
11  
12 4 proportion of all cases achieving guideline recommended LDL-targets.

13  
14 7 Screening programs in the region have been communicated by Singapore<sup>49</sup> and  
15  
16 8 Hong Kong<sup>50</sup>. Owing to high population densities in the region, family cascade  
17  
18 9 screening after the detection of an index case with FH could be particularly efficient  
19 and cost-effective. However, specific diagnostic criteria and guidelines in the region  
20  
21 10 are only available from Australia<sup>51</sup>, Japan<sup>52</sup> and South Korea<sup>53</sup>. The Australasian  
22  
23 11 model of care is a comprehensive clinical guideline encompassing elements of index  
24  
25 12 case detection, diagnosis and assessment, management, cascade screening,  
26  
27 13 genetic testing and the organisation of clinical services<sup>51</sup>. The Japanese criteria are  
28  
29 14 based on the detection of tendon xanthomata<sup>52</sup>, which may only be present in ~30%  
30  
31 15 of FH patients and particularly uncommon in the young<sup>54</sup>, and hence may have low  
32  
33 16 sensitivity in screening and detecting FH. A study from South Korea demonstrated  
34  
35 17 the lack of detection power with all conventional clinical criteria and suggested an  
36  
37 18 LDL-C cut-off of 225mg/dL (~5.8mmol/L)<sup>53</sup>. However, the LDL-C cut-off was derived  
38  
39 19 from a biased sample of patients with existing hypercholesterolemia. The lack of  
40  
41 20 country-specific criteria may contribute to the lack of active screening programs  
42  
43 21 employed in the region and the cost of genetic testing in the community beyond  
44  
45 22 research studies is not justified. FH research in the region is highly warranted; the  
46  
47 23 mutation spectrum of FH is different from the European spectrum<sup>55</sup> and the mean  
48  
49 24 cholesterol concentrations in most Asian countries are lower compared with Western  
50  
51 25 countries<sup>16</sup>. Recent evidence from the US indicating that pathogenic mutations in the  
52  
53 26 LDLr pathway predicts CAD across a wide spectrum of plasma LDL-C levels implies  
54  
55 27 that further enquiries could focus on the use of and value of genetic testing in  
56  
57 28 diagnosing and stratifying risk among patients with FH in the Asia-Pacific region<sup>17 56</sup>.  
58  
59 29  
60 30 The integrated international guidance on FH<sup>1</sup>, endorsed by the Asian-Pacific Society  
31  
32 31 of Atherosclerosis and Vascular Disease<sup>57</sup>, provides a foundation for developing  
33  
34 32 country-specific guidelines, services and models of care. The principles are similar,  
35  
36 33 but require the development of country-specific recommendations to screen,



1  
2  
3 1 diagnose and treat FH, as well as strategies for long-term adherence and goal  
4 2 attainment<sup>58</sup>. Country-specific challenges in developing screening programs may  
5 3 relate to their healthcare systems, as well as diverse cultures, political systems and  
6 4 economies<sup>59 60</sup> in the region. Challenges in treatment and management include the  
7 5 tolerability of statins, its availability and affordability<sup>61</sup>, and its acceptability against  
8 6 the popularity of complementary and alternative medicines<sup>62 63</sup>. The FH “Ten  
9 7 Countries Study” group is the first collaborative effort in the region focusing  
10 8 specifically on FH and should hopefully see the extension of the series of studies,  
11 9 including the present study, into the translation and transference of the research  
12 10 findings to country-specific models of cares<sup>13</sup>.

## 11 **CONCLUSION**

12 The present study identified substantial deficits in FH knowledge and awareness  
13 14 among physicians in the Asia-Pacific region, in particular, awareness of guidelines  
15 15 and knowledge of diagnostic features of FH. Knowledge of FH heritability,  
16 16 prevalence and CVD risk were also suboptimal. Major treatment gaps were identified  
17 17 in Vietnam and gaps in family screening were noted in Japan. However, through  
18 18 extensive FH education, awareness programs and implementation of country-  
19 19 specific guidelines, these gaps can be addressed to accelerate the pace of FH  
20 20 diagnosis and treatment. Similar surveys are required in specialists practicing  
21 21 coronary prevention in the region. A potentially effective method of standardising  
care across countries is participation in an international registry<sup>64</sup>.

## 1 **Acknowledgement**

2 The study was undertaken under the aegis of the FH Australasia Network (FHAN), the  
3 Australian Atherosclerosis Society (AAS) Inc and the Asian-Pacific Society of  
4 Atherosclerosis and Vascular Disease (APSAVD). We thank Ms Natasha Whitwell and  
5 Ms Jennifer Seabrook for their excellent assistance. We also acknowledge the team  
6 members for this “Ten Countries Study” project: Suraya Abdul-Razak, Norsiah Ali and  
7 Mohammad Husni Jamal.

## 9 **Funding**

10 The “Ten Countries Study” was funded by the International Atherosclerosis Society (IAS)  
11 and Pfizer Independent Grants for Learning & Change (Grant ID: 10839501). The data  
12 collection in Malaysia was partly funded by the Universiti Teknologi MARA (UiTM) Lestari  
13 Grant Scheme no: 600-IRMI/DANA 5/3/LESTARI (0161/2016).

## 15 **Competing interests**

16 All authors have completed the Unified Competing Interest form. TM reports grants from  
17 JSPS during the conduct of the study; grants from Denka-Seiken, Shino-test, MSD and  
18 Otsuka outside the submitted work; and honoraria from Sanofi, Astellas-Amgen, Astra  
19 Zeneca, Otsuka, Takeda, Kowa, Denka-Seiken, Sekisui-Medical, Kyowa Medex and  
20 Wako. HS reports research grants from Alexion, Amgen, MSD and Pfizer; and personal  
21 fees and education grants from Aegerion, Amgen, Janssen Cilag Ltd, MSD, Pfizer, Novo  
22 Nordisk and Sanofi. SY reports grants and personal fees from Kowa, Otsuka, Shionogi,  
23 Bayer Yakuhin, MSD, Takeda, Sanwa Kagaku Kenkyusho, Astellas, Daiichi-Sankyo,  
24 Astra Zeneca and Kaken; grants from Nippon Boehringer Ingelheim, Kyowa Medex,  
25 Mochida, Hayashibara, Teijin, Kissei and National Institute of Biomedical Innovation; and  
26 personal fees from Medical Review Co., Skylight Biotech, Pfizer, Bristol-Meyers, Astellas-  
27 Amgen, Sanofi, Agerion and Toa Eiyuu, outside the submitted work. In addition, SY has  
28 two pending patents, Fujirebio and Kyowa Medex. BT reports grants and personal fees  
29 from Amgen; grants from AstraZeneca, Merk Sharp & Dohme, Novartis, Pfizer and  
30 Roche; personal fees from Merck Serono and Sanofi, outside the submitted work. GFW  
31 reports grants from Sanofi /Regeneron during the conduct of the study; grants and  
32 personal fees from Sanofi /Regeneron and Amgen; personal fees from Gemphire and

1 Kowa, outside the submitted work. JP, THT, NTK, ASR, JEP, LGS, JL, XW, MH, HMN  
2 and SK have nothing to disclose.

### 3 **Contributorship statement**

4 JP designed data collection tools, implemented the study for the all countries, monitored  
5 data collection, cleaned and analysed the data, and drafted and revised the paper. MH  
6 and BT implemented the study in Hong Kong and revised the draft paper. JL and XW  
7 implemented the study in China and revised the draft paper. TM and SY implemented the  
8 study in Japan and revised the draft paper. HMN and ASR implemented the study in  
9 Malaysia and revised the draft paper. JEP implemented the study in South Korea and  
10 revised the draft paper. THT and NTK implemented the study in Vietnam and revised the  
11 draft paper. HS and SK implemented the study in the United Kingdom and revised the  
12 draft paper. LGS implemented the study in the Philippines and revised the draft paper. TS  
13 implemented the study in Taiwan and revised the draft paper. GFW initiated the  
14 collaborative project, designed data collection tools, implemented the study for the all  
15 countries, advised the statistical analysis plan and revised the paper.

### 16 **Transparency declaration**

17 JP affirms that the manuscript is an honest, accurate, and transparent account of the  
18 study being reported; that no important aspects of the study have been omitted; and that  
19 any discrepancies from the study as planned (and, if relevant, registered) have been  
20 explained.

### 21 **Date sharing statement**

22 No additional data available. Extra details on data presented in the current study is  
23 available by emailing [jing.pang@uwa.edu.au](mailto:jing.pang@uwa.edu.au).

1  
2  
3 **Table 1: Summary of PCP's demographics and responses to questions (%) about awareness, knowledge, practices and preferences regarding FH in "Ten Countries".**

| 4 Country/Region                                                                                                 | Australia | Japan | Malaysia | South Korea | Philippines | Hong Kong | China | Vietnam | Taiwan | United Kingdom <sup>15</sup> |
|------------------------------------------------------------------------------------------------------------------|-----------|-------|----------|-------------|-------------|-----------|-------|---------|--------|------------------------------|
| 5 Number of PCPs                                                                                                 | 151       | 197   | 219      | 97          | 62          | 59        | 118   | 137     | 38     | 100                          |
| 6 <b>DEMOGRAPHICS</b>                                                                                            |           |       |          |             |             |           |       |         |        |                              |
| 7 Male                                                                                                           | 62%       | 84%   | 24%      | 81%         | 37%         | 53%       | 42%   | 46%     | 74%    | 42%                          |
| 9 Urban/Metropolitan                                                                                             | 52%       | 49%   | 63%      | 82%         | 63%         | 100%      | 82%   | 40%     | 100%   | 47%                          |
| 10 Suburban/Outer metropolitan                                                                                   | 33%       | 30%   | 0%       | 14%         | 15%         | 0%        | 18%   | 27%     | 0%     | 44%                          |
| 11 Rural                                                                                                         | 16%       | 21%   | 37%      | 4%          | 23%         | 0%        | 0%    | 33%     | 0%     | 9%                           |
| 13 <b>AWARENESS</b>                                                                                              |           |       |          |             |             |           |       |         |        |                              |
| 14 Familiarity of FH rated as above average                                                                      | 32%       | 23%   | 38%      | 28%         | 34%         | 50%       | 23%   | 49%     | 47%    | 39%                          |
| 16 Awareness about FH guidelines                                                                                 | 36%       | 47%   | 35%      | 34%         | N/A         | 43%       | 8%    | 28%     | 53%    | 61%                          |
| 17 Awareness about lipid specialists                                                                             | 51%       | 33%   | 34%      | 30%         | 31%         | 40%       | 12%   | 39%     | 57%    | 50%                          |
| 18 <b>KNOWLEDGE</b>                                                                                              |           |       |          |             |             |           |       |         |        |                              |
| 20 Correctly described FH                                                                                        | 72%       | 77%   | 86%      | 51%         | 73%         | 62%       | 75%   | 65%     | 60%    | 89%                          |
| 21 Correctly identified lipid profile                                                                            | 59%       | 85%   | 65%      | 57%         | 48%         | 51%       | 85%   | 45%     | 61%    | 74%                          |
| 22 Correctly identified prevalence of FH in the community                                                        | 26%       | 41%   | 24%      | 19%         | 16%         | 11%       | 17%   | 14%     | 30%    | 30%                          |
| 24 Correctly identified the transmission rate of FH to first degree relatives                                    | 44%       | 40%   | 49%      | 42%         | 37%         | 49%       | 36%   | 26%     | 61%    | 51%                          |
| 25 Correctly identified the CVD risk in untreated FH patients                                                    | 14%       | 13%   | 9%       | 8%          | 10%         | 7%        | 4%    | 2%      | 5%     | 14%                          |
| 27 Correctly identified that genetic testing was not required to accurately diagnose FH                          | 50%       | 52%   | 47%      | 64%         | 68%         | 38%       | 38%   | 58%     | 24%    | 52%                          |
| 28 Selected statins to best treat hypercholesterolemia                                                           | 89%       | 85%   | 96%      | 90%         | 95%         | 93%       | 95%   | 75%     | 95%    | 94%                          |
| 29 Selected a combination of statin and ezetimibe to treat severe hypercholesterolemia                           | 64%       | 48%   | 56%      | 70%         | 48%         | 49%       | 77%   | 31%     | 63%    | 50%                          |
| 30 <b>PRACTICE</b>                                                                                               |           |       |          |             |             |           |       |         |        |                              |
| 32 Screened patients with premature CAD for family history                                                       | 93%       | 83%   | 95%      | 89%         | 92%         | 95%       | 94%   | 85%     | 95%    | 90%                          |
| 33 Performed routine family screening of patients with FH (if there were FH patients under their care)           | 86%       | 30%   | 82%      | 50%         | 53%         | 90%       | 47%   | 83%     | 77%    | 73%                          |
| 34 The most prevalent age for screening young people in a kindred with FH was 13-18 years, which was selected by | 52%       | 18%   | 52%      | 54%         | 52%         | 48%       | 16%   | 33%     | 20%    | 45%                          |
| 36 Have referred FH patients to a lipid specialists (if aware of lipid specialist)                               | 66%       | 26%   | 52%      | 57%         | 32%         | 86%       | 86%   | 49%     | 100%   | 72%                          |
| 37 <b>PREFERENCE</b>                                                                                             |           |       |          |             |             |           |       |         |        |                              |
| 39 Selected PCPs as the most effective health care provider for the early detection of FH                        | 80%       | 45%   | 92%      | 71%         | 58%         | 76%       | 8%    | 23%     | 50%    | 82%                          |
| 40 Selected interpretive commenting on lipid profiles to highlight patients at risk of FH                        | 89%       | 57%   | 92%      | 84%         | 92%         | 85%       | 86%   | 72%     | 89%    | 88%                          |

1

2 **Table 2: Comparison of PCP's responses to questions about FH awareness, knowledge, practices and preferences with the United Kingdom as the**  
 3 **reference group using logistic regression analyses; odds ratio (95% confidence interval) shown.**

| Country/Region                                                                                      | Australia             | Japan                 | Malaysia              | South Korea           | Philippines          | Hong Kong             | China                 | Vietnam               | Taiwan                |
|-----------------------------------------------------------------------------------------------------|-----------------------|-----------------------|-----------------------|-----------------------|----------------------|-----------------------|-----------------------|-----------------------|-----------------------|
| <b>AWARENESS</b>                                                                                    |                       |                       |                       |                       |                      |                       |                       |                       |                       |
| Familiarity of FH rated as above average                                                            | 0.73<br>(0.43-1.24)   | 0.47<br>(0.28-0.79)*  | 0.95<br>(0.58-1.55)   | 0.61<br>(0.33-1.11)   | 0.80<br>(0.41-1.55)  | 1.56<br>(0.81-3.01)   | 0.46<br>(0.25-0.83)*  | 1.52<br>(0.90-2.57)   | 1.41<br>(0.66-2.99)   |
| Awareness about FH guidelines                                                                       | 0.34<br>(0.21-0.61)** | 0.58<br>(0.36-0.95)*  | 0.35<br>(0.22-0.58)** | 0.34<br>(0.19-0.61)** | N/A                  | 0.49<br>(0.26-0.95)*  | 0.05<br>(0.02-0.12)** | 0.25<br>(0.14-0.43)** | 0.72<br>(0.34-1.53)   |
| Awareness about lipid specialists                                                                   | 1.03<br>(0.62-1.71)   | 0.5<br>(0.30-0.82)*   | 0.51<br>(0.31-0.83)*  | 0.43<br>(0.24-0.78)*  | 0.44<br>(0.23-0.86)* | 0.68<br>(0.35-1.31)   | 0.14<br>(0.07-0.27)** | 0.64<br>(0.37-1.11)   | 1.33<br>(0.61-2.90)   |
| <b>KNOWLEDGE</b>                                                                                    |                       |                       |                       |                       |                      |                       |                       |                       |                       |
| Correctly described FH                                                                              | 0.33<br>(0.16-0.68)*  | 0.42<br>(0.21-0.86)*  | 0.78<br>(0.37-1.62)   | 0.13<br>(0.06-0.28)** | 0.34<br>(0.15-0.78)* | 0.21<br>(0.09-0.48)** | 0.38<br>(0.18-0.82)*  | 0.24<br>(0.12-0.50)** | 0.19<br>(0.07-0.50)*  |
| Correctly identified lipid profile                                                                  | 0.52<br>(0.30-0.90)*  | 2.06<br>(1.12-3.77)*  | 0.65<br>(0.38-1.10)   | 0.47<br>(0.26-0.85)*  | 0.33<br>(0.17-0.65)* | 0.37<br>(0.18-0.65)*  | 2.07<br>(1.05-4.10)*  | 0.29<br>(0.16-0.51)** | 0.55<br>(0.25-1.20)   |
| Correctly identified prevalence of FH in the community                                              | 0.80<br>(0.46-1.41)   | 1.60<br>(0.96-2.69)   | 0.73<br>(0.43-1.25)   | 0.54<br>(0.27-1.06)   | 0.44<br>(0.20-0.99)  | 0.28<br>(0.11-0.71)*  | 0.49<br>(0.25-0.93)*  | 0.38<br>(0.20-0.73)*  | 0.97<br>(0.43-2.22)   |
| Correctly identified the transmission rate of FH to first degree relatives                          | 0.74<br>(0.44-1.23)   | 0.63<br>(0.39-1.03)   | 0.91<br>(0.56-1.48)   | 0.70<br>(0.38-1.27)   | 0.57<br>(0.30-1.08)  | 0.92<br>(0.46-1.84)   | 0.54<br>(0.31-0.93)*  | 0.34<br>(0.19-0.59)** | 1.52<br>(0.68-3.46)   |
| Correctly identified the CVD risk in untreated FH patients                                          | 0.97<br>(0.46-2.02)   | 0.90<br>(0.44-1.83)   | 0.59<br>(0.28-1.22)   | 0.56<br>(0.22-1.40)   | 0.66<br>(0.24-1.81)  | 0.46<br>(0.14-1.48)   | 0.28<br>(0.10-0.81)*  | 0.15<br>(0.04-0.52)*  | 0.34<br>(0.07-1.58)   |
| Correctly identified that genetic testing was not required to accurately diagnose FH                | 0.91<br>(0.55-1.51)   | 1.00<br>(0.61-1.62)   | 0.83<br>(0.51-1.33)   | 1.63<br>(0.92-2.90)   | 1.94<br>(1.00-3.76)  | 0.56<br>(0.29-1.09)   | 0.56<br>(0.33-0.97)*  | 1.28<br>(0.76-2.17)   | 0.30<br>(0.13-0.96)*  |
| Selected statins to best treat hypercholesterolemia                                                 | 0.50<br>(0.19-1.32)   | 0.37<br>(0.15-0.92)*  | 1.68<br>(0.57-4.99)   | 0.56<br>(0.19-1.59)   | 1.26<br>(0.30-5.21)  | 0.88<br>(0.24-3.25)   | 1.19<br>(0.37-3.82)   | 0.19<br>(0.08-0.48)*  | 0.74<br>(0.18-3.14)   |
| Selected a combination of statin and ezetimibe to treat severe hypercholesterolemia                 | 1.75<br>(1.04-2.92)*  | 0.91<br>(0.56-1.48)   | 1.26<br>(0.78-2.02)   | 2.34<br>(1.31-4.21)*  | 0.94<br>(0.50-1.77)  | 0.97<br>(0.51-1.84)   | 3.37<br>(1.88-6.03)** | 0.46<br>(0.27-0.78)*  | 1.71<br>(0.80-3.69)   |
| <b>PRACTICE</b>                                                                                     |                       |                       |                       |                       |                      |                       |                       |                       |                       |
| Screened patients with premature CAD for family history                                             | 1.57<br>(0.63-3.91)   | 0.53<br>(0.25-1.23)   | 2.10<br>(0.86-5.12)   | 0.87<br>(0.35-2.15)   | 1.27<br>(0.41-3.90)  | 2.07<br>(0.55-7.86)   | 1.76<br>(0.65-4.81)   | 0.61<br>(0.28-1.37)   | 2.00<br>(0.42-9.58)   |
| Performed routine family screening of patients with FH (if there were FH patients under their care) | 2.25<br>(0.81-6.22)   | 0.16<br>(0.06-0.40)** | 1.75<br>(0.65-4.70)   | 0.38<br>(0.14-1.04)   | 0.43<br>(0.17-1.06)  | 3.38<br>(0.93-12.21)  | 0.34<br>(0.10-1.10)   | 1.88<br>(0.34-10.27)  | 1.23<br>(0.39-3.86)   |
| Selected 13-18 years as most appropriate for screening young people in a kindred with FH            | 1.32<br>(0.79-2.21)   | 0.27<br>(0.16-0.47)** | 1.30<br>(0.81-2.10)   | 1.42<br>(0.81-2.51)   | 1.28<br>(0.68-2.42)  | 1.12<br>(0.58-2.15)   | 0.23<br>(0.12-0.43)** | 0.59<br>(0.34-1.02)   | 0.30<br>(0.12-0.75)*  |
| Have referred FH patients to a lipid specialists (if aware of lipid specialist)                     | 0.75<br>(0.34-1.64)   | 0.14<br>(0.06-0.32)** | 0.42<br>(0.20-0.91)*  | 0.52<br>(0.20-1.37)   | 0.18<br>(0.06-0.57)* | 2.33<br>(0.59-9.18)   | 2.33<br>(0.46-11.78)  | 0.37<br>(0.15-0.88)*  | 1                     |
| <b>PREFERENCE</b>                                                                                   |                       |                       |                       |                       |                      |                       |                       |                       |                       |
| Selected PCPs as the most effective health care provider for the early detection of FH              | 0.89<br>(0.46-1.69)   | 0.18<br>(0.10-0.32)** | 2.61<br>(1.28-5.31)*  | 0.54<br>(0.28-1.06)   | 0.30<br>(0.15-0.62)* | 0.71<br>(0.32-1.55)   | 0.02<br>(0.01-0.05)** | 0.07<br>(0.04-0.13)** | 0.22<br>(0.10-0.50)** |
| Selected interpretive commenting on lipid profiles to highlight patients at risk of FH              | 1.15<br>(0.52-2.55)   | 0.18<br>(0.09-0.35)*  | 1.52<br>(0.70-3.30)** | 0.69<br>(0.31-1.55)   | 1.55<br>(0.52-4.65)  | 0.76<br>(0.30-1.92)   | 0.81<br>(0.37-1.79)   | 0.36<br>(0.17-0.72)*  | 1.16<br>(0.35-3.84)   |

4 \*p<0.05, \*\*p<0.001, significantly less than the United Kingdom, significantly more than the United Kingdom.

1  
2  
3 **References**

- 4  
5 1. Watts GF, Gidding S, Wierzbicki AS, et al. Integrated Guidance on the Care of Familial  
6 Hypercholesterolaemia from the International FH Foundation. *Int J Cardiol*  
7 2014;171(3):309-25.
- 8 2. Benn M, Watts GF, Tybjaerg-Hansen A, et al. Familial Hypercholesterolemia in the Danish  
9 General Population: Prevalence, Coronary Artery Disease, and Cholesterol-Lowering  
10 Medication. *J Clin Endocrinol Metab* 2012;97(11):3956-64.
- 11 3. Shi Z, Yuan B, Zhao D, et al. Familial hypercholesterolemia in China: Prevalence and  
12 evidence of underdetection and undertreatment in a community population. *Int J*  
13 *Cardiol* 2014;174(3):834-36.
- 14 4. Watts GF, Shaw JE, Pang J, et al. Prevalence and treatment of familial  
15 hypercholesterolemia in Australian communities. *Int J Cardiol* 2015;185:69-71. doi:  
16 10.1016/j.ijcard.2015.03.027
- 17 5. Miller PE, Martin SS, Toth PP, et al. Screening and advanced lipid phenotyping in familial  
18 hypercholesterolemia: The Very Large Database of Lipids Study-17 (VLDL-17). *J Clin*  
19 *Lipidol* 2015;9(5):676-83.
- 20 6. de Ferranti SD, Rodday AM, Mendelson MM, et al. Prevalence of Familial  
21 Hypercholesterolemia in the 1999 to 2012 United States National Health and  
22 Nutrition Examination Surveys (NHANES). *Circulation* 2016;133(11):1067-72. doi:  
23 10.1161/circulationaha.115.018791
- 24 7. Pang J, Sullivan DR, Harada-Shiba M, et al. Significant gaps in awareness of familial  
25 hypercholesterolemia among physicians in selected Asia-Pacific countries: A pilot  
26 study. *J Clin Lipidol* 2015;9(1):42-48.
- 27 8. Nordestgaard B, Chapman M, Humphries S, et al. Familial hypercholesterolaemia is  
28 underdiagnosed and undertreated in the general population: guidance for clinicians  
29 to prevent coronary heart disease (Consensus Statement of the European  
30 Atherosclerosis Society). *Eur Heart J* 2013;34(45):3478 - 90.
- 31 9. Hamilton-Craig I. Case-Finding for Familial Hypercholesterolemia in the Asia-Pacific  
32 Region. *Semin Vasc Med* 2004;4(01):87-92.
- 33 10. Kirke A, Watts GF, Emery J. Detecting familial hypercholesterolaemia in general  
34 practice. *Aust Fam Physician* 2012;41(12):965-68.
- 35 11. Qureshi N, Humphries SE, Seed M, et al. Identification and management of familial  
36 hypercholesterolaemia: what does it mean to primary care? *Br J Gen Pract*  
37 2009;59(567):773-78.
- 38 12. Bell DA, Garton-Smith J, Vickery A, et al. Familial Hypercholesterolaemia in Primary  
39 Care: Knowledge and Practices among General Practitioners in Western Australia.  
40 *Heart Lung Circ* 2014;23(4):309-13. doi: 10.1016/j.hlc.2013.08.005
- 41 13. Watts GF, Ding PY, George P, et al. Translational Research for Improving the Care of  
42 Familial Hypercholesterolemia: The "Ten Countries Study" and Beyond. *J Atheroscler*  
43 *Thromb* 2016;23(8):891-900.
- 44 14. National Institute for Health and Clinical Excellence, The National Collaborating Centre  
45 for Primary Care. NICE Clinical Guideline 71: Identification and management of  
46 familial hypercholesterolaemia 2008 [Available from:  
47 [www.nice.org.uk/nicemedia/pdf/CG071NICEGuideline.pdf](http://www.nice.org.uk/nicemedia/pdf/CG071NICEGuideline.pdf).  
48
- 49 15. Kwok S, Pang J, Adam S, et al. An online questionnaire survey of UK general  
50 practitioners' knowledge and management of familial hypercholesterolaemia. *BMJ*  
51 *Open* 2016;6(11):e012691. doi: 10.1136/bmjopen-2016-012691
- 52 16. Zhou M, Zhao D. Familial Hypercholesterolemia in Asian Populations. *J Atheroscler*  
53 *Thromb* 2016;23(5):539-49. doi: 10.5551/jat.34405
- 54 17. Khera AV, Won H-H, Peloso GM, et al. Diagnostic yield and clinical utility of sequencing  
55 familial hypercholesterolemia genes in patients with severe hypercholesterolemia. *J*  
56 *Am Coll Cardiol* 2016;67(22):2578-89.
- 57  
58  
59  
60

- 1  
2  
3 1 18. Mabuchi H, Nohara A, Noguchi T, et al. Molecular genetic epidemiology of homozygous  
4 2 familial hypercholesterolemia in the Hokuriku district of Japan. *Atherosclerosis*  
5 3 2011;214(2):404-07.  
6 4 19. Wong B, Kruse G, Kutikova L, et al. Cardiovascular Disease Risk Associated With  
7 5 Familial Hypercholesterolemia: A Systematic Review of the Literature. *Clin Ther*  
8 6 2016;38(7):1696-709.  
9 7 20. Wiegman A, Gidding SS, Watts GF, et al. Familial hypercholesterolaemia in children and  
10 8 adolescents: gaining decades of life by optimizing detection and treatment. *Eur Heart*  
11 9 *J* 2015;36(36):2425-37. doi: 10.1093/eurheartj/ehv157  
12 10 21. de Ferranti SD, Rodday AM, Parsons SK, et al. Cholesterol Screening and Treatment  
13 11 Practices and Preferences: A Survey of United States Pediatricians. *The Journal of*  
14 12 *Pediatrics* 2017 doi: <http://doi.org/10.1016/j.jpeds.2016.12.078>  
15 13 22. Dixon DB, Kornblum AP, Steffen LM, et al. Implementation of Lipid Screening Guidelines  
16 14 in Children by Primary Pediatric Providers. *The Journal of Pediatrics*  
17 15 2014;164(3):572-76.  
18 16 23. Watts GF, Sullivan DR, van Bockxmeer FM, et al. A New Model of Care for Familial  
19 17 Hypercholesterolaemia: What is the Role of Cardiology? *Heart Lung Circ*  
20 18 2012;21(9):543-50.  
21 19 24. Foody JM. Familial Hypercholesterolemia: An Under-recognized but Significant Concern  
22 20 in Cardiology Practice. *Clin Cardiol* 2013;37(2):119-25.  
23 21 25. Umans-Eckenhausen MAW, Defesche JC, Sijbrands EJG, et al. Review of first 5 years  
24 22 of screening for familial hypercholesterolaemia in the Netherlands. *Lancet*  
25 23 2001;357(9251):165-68.  
26 24 26. Bell DA, Bender R, Hooper AJ, et al. Impact of interpretative commenting on lipid profiles  
27 25 in people at high risk of familial hypercholesterolaemia. *Clin Chim Acta* 2013;422:21-  
28 26 25.  
29 27 27. Weng SF, Kai J, Andrew Neil H, et al. Improving identification of familial  
30 28 hypercholesterolaemia in primary care: Derivation and validation of the familial  
31 29 hypercholesterolaemia case ascertainment tool (FAMCAT). *Atherosclerosis*  
32 30 2015;238(2):336-43.  
33 31 28. Troeung L, Arnold-Reed D, Chan She Ping-Delfos W, et al. A new electronic screening  
34 32 tool for identifying risk of familial hypercholesterolaemia in general practice. *Heart*  
35 33 2016;heartjnl-2015-308824v1. doi: 10.1136/heartjnl-2015-308824  
36 34 29. Vickery AW, Ryan J, Pang J, et al. Increasing the Detection of FH Using General  
37 35 Practice Electronic Databases. *Heart Lung Circ* 2016;26:450-54. doi:  
38 36 10.1016/j.hlc.2016.09.012  
39 37 30. Bell DA, Hooper AJ, Bender R, et al. Opportunistic screening for familial  
40 38 hypercholesterolaemia via a community laboratory. *Ann Clin Biochem*  
41 39 2012;49(6):534-37.  
42 40 31. Bell DA, Edwards G, Hooper AJ, et al. The potential role of an expert computer system  
43 41 to augment the opportunistic detection of individuals with familial  
44 42 hypercholesterolaemia from a community laboratory. *Clin Chim Acta* 2015;448(0):18-  
45 43 21.  
46 44 32. Bell DA, Hooper AJ, Edwards G, et al. Detecting familial hypercholesterolaemia in the  
47 45 community: Impact of a telephone call from a chemical pathologist to the requesting  
48 46 general practitioner. *Atherosclerosis* 2014;234(2):469-72.  
49 47 33. Hopkins PN, Stephenson S, Wu LL, et al. Evaluation of coronary risk factors in patients  
50 48 with heterozygous familial hypercholesterolemia. *The American Journal of Cardiology*  
51 49 2001;87(5):547-53.  
52 50 34. De Sauvage Nolting PRW, Defesche JC, Buirma RJA, et al. Prevalence and significance  
53 51 of cardiovascular risk factors in a large cohort of patients with familial  
54 52 hypercholesterolaemia. *J Intern Med* 2003;253(2):161-68. doi: 10.1046/j.1365-  
55 52 2796.2003.01070.x  
56 53

- 1  
2  
3 1 35. Jansen ACM, van Aalst-Cohen ES, Tanck MW, et al. The contribution of classical risk  
4 2 factors to cardiovascular disease in familial hypercholesterolaemia: data in 2400  
5 3 patients. *J Intern Med* 2004;256(6):482-90. doi: 10.1111/j.1365-2796.2004.01405.x  
6 4 36. Neil HAW, Seagroatt V, Betteridge DJ, et al. Established and emerging coronary risk  
7 5 factors in patients with heterozygous familial hypercholesterolaemia. *Heart*  
8 6 2004;90(12):1431-37. doi: 10.1136/hrt.2003.022764  
9 7 37. Nenseter MS, Lindvig HW, Ueland T, et al. Lipoprotein (a) levels in coronary heart  
10 8 disease-susceptible and-resistant patients with familial hypercholesterolemia.  
11 9 *Atherosclerosis* 2011;216(2):426-32.  
12 10 38. Alonso R, Andres E, Mata N, et al. Lipoprotein (a) levels in Familial  
13 11 Hipercholesterolaemia: an important predictor for cardiovascular disease  
14 12 independent of the type of LDL-receptor mutation. *J Am Coll Cardiol*  
15 13 2014;63(19):1982-89.  
16 14 39. Allard MD, Saeedi R, Yousefi M, et al. Risk stratification of patients with familial  
17 15 hypercholesterolemia in a multi-ethnic cohort. *Diabetes* 2014;13:65.  
18 16 40. Chan DC, Pang J, Hooper AJ, et al. Elevated lipoprotein(a), hypertension and renal  
19 17 insufficiency as predictors of coronary artery disease in patients with genetically  
20 18 confirmed heterozygous familial hypercholesterolemia. *Int J Cardiol* 2015;201:633-  
21 19 38.  
22 20 41. Ueshima H, Sekikawa A, Miura K, et al. Cardiovascular Disease and Risk Factors in Asia  
23 21 A Selected Review. *Circulation* 2008;118(25):2702-09.  
24 22 42. Jervise L, Hanson M, Bell D, et al. An audit of pharmacists' knowledge of familial  
25 23 hypercholesterolaemia: Implications for community healthcare. *Australian Pharmacist*  
26 24 2013;July:73-75.  
27 25 43. Rangarajan N, Balasubramanian S, Pang J, et al. Knowledge and Awareness of Familial  
28 26 Hypercholesterolaemia among Registered Medical Practitioners in Tamil Nadu: Are  
29 27 They Suboptimal? *Journal of Clinical and Diagnostic Research* 2016;10(5):OC52-56.  
30 28 44. Schofield J, France M, Capps N, et al. Knowledge gaps in the management of familial  
31 29 hypercholesterolaemia. A UK based survey. *Atherosclerosis* 2016;252:161-65.  
32 30 45. Bell DA, Kirke AB, Barbour R, et al. Can Patients be Accurately Assessed for Familial  
33 31 Hypercholesterolaemia in Primary Care? *Heart Lung Circ* 2014;23(12):1153-57.  
34 32 46. Roeters van Lennep JE. Knowledge equals health; why all healthcare professionals  
35 33 should know about familial hypercholesterolemia. *Atherosclerosis* 2016;252:188-89.  
36 34 doi: 10.1016/j.atherosclerosis.2016.07.928  
37 35 47. Vallejo-Vaz AJ, Kondapally Seshasai SR, Cole D, et al. Familial hypercholesterolaemia:  
38 36 A global call to arms. *Atherosclerosis* 2015;243(1):257-59.  
39 37 48. Withycombe B, Winden JC, Hassany R, et al. The extent of familial  
40 38 hypercholesterolemia instruction in US schools and colleges of medicine, pharmacy,  
41 39 and osteopathic medicine. *J Clin Lipidol* 2015;9:281-88.  
42 40 49. Tai E, Ming Loh L, Sethi SK, et al. MEDPED comes to Singapore. *Atherosclerosis*  
43 41 2001;154(1):252.  
44 42 50. Hu M, Lan W, Lam CW, et al. Heterozygous familial hypercholesterolemia in Hong Kong  
45 43 Chinese. Study of 252 cases. *Int J Cardiol* 2013;167(3):762-7. doi:  
46 44 10.1016/j.ijcard.2012.03.048  
47 45 51. Watts GF, Sullivan DR, Poplawski N, et al. Familial hypercholesterolaemia: A model of  
48 46 care for Australasia. *Atherosclerosis Supplements* 2011;12:221-63. doi:  
49 47 10.1016/j.atherosclerosis.2011.06.001  
50 48 52. Harada-Shiba M, Arai H, Oikawa S, et al. Guidelines for the management of familial  
51 49 hypercholesterolemia. *J Atheroscler Thromb* 2012;19(12):1043-60.  
52 50 53. Shin DG, Han SM, Kim DI, et al. Clinical features of familial hypercholesterolemia in  
53 51 Korea: Predictors of pathogenic mutations and coronary artery disease – A study  
54 52 supported by the Korean Society of Lipidology and Atherosclerosis. *Atherosclerosis*  
55 53 2015;243(1):53-58.



- 1  
2  
3 1 54. Civeira F, Castillo S, Alonso R, et al. Tendon xanthomas in familial hypercholesterolemia  
4 2 are associated with cardiovascular risk independently of the low-density lipoprotein  
5 3 receptor gene mutation. *Arterioscler Thromb Vasc Biol* 2005;25(9):1960-65.  
6 4 55. Livi A, Lye SH. Familial hypercholesterolemia in Asia: a review. *Journal of OMICS*  
7 5 *Research* 2011;1(1):22-31.  
8 6 56. Abul-Husn NS, Manickam K, Jones LK, et al. Genetic identification of familial  
9 7 hypercholesterolemia within a single U.S. health care system. *Science*  
10 8 2016;354(6319) doi: 10.1126/science.aaf7000  
11 9 57. Arai H, Ding Y-A, Yamashita S. Impact of the Integrated Guidance on the Care of  
12 10 Familial Hypercholesterolaemia. *J Atheroscler Thromb* 2014;21(4):366-74.  
13 11 58. Kim H-S, Wu Y, Lin S-J, et al. Current status of cholesterol goal attainment after statin  
14 12 therapy among patients with hypercholesterolemia in Asian countries and region: the  
15 13 Return on Expenditure Achieved for Lipid Therapy in Asia (REALITY-Asia) study.  
16 14 *Curr Med Res Opin* 2008;24(7):1951-63.  
17 15 59. Kamae I. Value-based approaches to healthcare systems and pharmacoeconomics  
18 16 requirements in Asia. *Pharmacoeconomics* 2010;28(10):831-38.  
19 17 60. O'Donnell O, Van Doorslaer E, Rannan-Eliya RP, et al. Who pays for health care in  
20 18 Asia? *J Health Econ* 2008;27(2):460-75.  
21 19 61. Khatib R, McKee M, Shannon H, et al. Availability and affordability of cardiovascular  
22 20 disease medicines and their effect on use in high-income, middle-income, and low-  
23 21 income countries: an analysis of the PURE study data. *The Lancet*  
24 22 2016;387(10013):61-69.  
25 23 62. Ock SM, Choi JY, Cha YS, et al. The Use of Complementary and Alternative Medicine in  
26 24 a General Population in South Korea: Results from a National Survey in 2006. *J*  
27 25 *Korean Med Sci* 2009;24(1):1-6.  
28 26 63. Chen F-P, Chen T-J, Kung Y-Y, et al. Use frequency of traditional Chinese medicine in  
29 27 Taiwan. *BMC Health Serv Res* 2007;7(1):26.  
30 28 64. Vallejo-Vaz AJ, Akram A, Kondapally Seshasai SR, et al. Pooling and expanding  
31 29 registries of familial hypercholesterolaemia to assess gaps in care and improve  
32 30 disease management and outcomes: Rationale and design of the global EAS  
33 31 Familial Hypercholesterolaemia Studies Collaboration. *Atherosclerosis Supplements*  
34 32 2016;22:1-32.

33

STROBE 2007 (v4) Statement—Checklist of items that should be included in reports of *cross-sectional studies*

| Section/Topic             | Item # | Recommendation                                                                                                                                                                       | Reported on page # |
|---------------------------|--------|--------------------------------------------------------------------------------------------------------------------------------------------------------------------------------------|--------------------|
| Title and abstract        | 1      | (a) Indicate the study’s design with a commonly used term in the title or the abstract                                                                                               | 3                  |
|                           |        | (b) Provide in the abstract an informative and balanced summary of what was done and what was found                                                                                  | 3                  |
| <b>Introduction</b>       |        |                                                                                                                                                                                      |                    |
| Background/rationale      | 2      | Explain the scientific background and rationale for the investigation being reported                                                                                                 | 5                  |
| Objectives                | 3      | State specific objectives, including any prespecified hypotheses                                                                                                                     | 5                  |
| <b>Methods</b>            |        |                                                                                                                                                                                      |                    |
| Study design              | 4      | Present key elements of study design early in the paper                                                                                                                              | 5                  |
| Setting                   | 5      | Describe the setting, locations, and relevant dates, including periods of recruitment, exposure, follow-up, and data collection                                                      | 5-6                |
| Participants              | 6      | (a) Give the eligibility criteria, and the sources and methods of selection of participants                                                                                          | 5-6                |
| Variables                 | 7      | Clearly define all outcomes, exposures, predictors, potential confounders, and effect modifiers. Give diagnostic criteria, if applicable                                             | 5-6                |
| Data sources/ measurement | 8*     | For each variable of interest, give sources of data and details of methods of assessment (measurement). Describe comparability of assessment methods if there is more than one group | 5-6                |
| Bias                      | 9      | Describe any efforts to address potential sources of bias                                                                                                                            | 4                  |
| Study size                | 10     | Explain how the study size was arrived at                                                                                                                                            | 4                  |
| Quantitative variables    | 11     | Explain how quantitative variables were handled in the analyses. If applicable, describe which groupings were chosen and why                                                         | 6                  |
| Statistical methods       | 12     | (a) Describe all statistical methods, including those used to control for confounding                                                                                                | 6                  |
|                           |        | (b) Describe any methods used to examine subgroups and interactions                                                                                                                  | 6                  |
|                           |        | (c) Explain how missing data were addressed                                                                                                                                          | N/A                |
|                           |        | (d) If applicable, describe analytical methods taking account of sampling strategy                                                                                                   | N/A                |
|                           |        | (e) Describe any sensitivity analyses                                                                                                                                                | N/A                |
| <b>Results</b>            |        |                                                                                                                                                                                      |                    |

1  
2  
3  
4  
5  
6  
7  
8  
9  
10  
11  
12  
13  
14  
15  
16  
17  
18  
19  
20  
21  
22  
23  
24  
25  
26  
27  
28  
29  
30  
31  
32  
33  
34  
35  
36  
37  
38  
39  
40  
41  
42  
43  
44  
45  
46  
47  
48  
49

|                          |     |                                                                                                                                                                                                              |        |
|--------------------------|-----|--------------------------------------------------------------------------------------------------------------------------------------------------------------------------------------------------------------|--------|
| Participants             | 13* | (a) Report numbers of individuals at each stage of study—eg numbers potentially eligible, examined for eligibility, confirmed eligible, included in the study, completing follow-up, and analysed            | N/A    |
|                          |     | (b) Give reasons for non-participation at each stage                                                                                                                                                         | N/A    |
|                          |     | (c) Consider use of a flow diagram                                                                                                                                                                           | N/A    |
| Descriptive data         | 14* | (a) Give characteristics of study participants (eg demographic, clinical, social) and information on exposures and potential confounders                                                                     | 6 & 15 |
|                          |     | (b) Indicate number of participants with missing data for each variable of interest                                                                                                                          | N/A    |
| Outcome data             | 15* | Report numbers of outcome events or summary measures                                                                                                                                                         | N/A    |
| Main results             | 16  | (a) Give unadjusted estimates and, if applicable, confounder-adjusted estimates and their precision (eg, 95% confidence interval). Make clear which confounders were adjusted for and why they were included | 17     |
|                          |     | (b) Report category boundaries when continuous variables were categorized                                                                                                                                    | N/A    |
|                          |     | (c) If relevant, consider translating estimates of relative risk into absolute risk for a meaningful time period                                                                                             | N/A    |
| Other analyses           | 17  | Report other analyses done—eg analyses of subgroups and interactions, and sensitivity analyses                                                                                                               | N/A    |
| <b>Discussion</b>        |     |                                                                                                                                                                                                              |        |
| Key results              | 18  | Summarise key results with reference to study objectives                                                                                                                                                     | 8-10   |
| Limitations              | 19  | Discuss limitations of the study, taking into account sources of potential bias or imprecision. Discuss both direction and magnitude of any potential bias                                                   | 4 & 10 |
| Interpretation           | 20  | Give a cautious overall interpretation of results considering objectives, limitations, multiplicity of analyses, results from similar studies, and other relevant evidence                                   | 12     |
| Generalisability         | 21  | Discuss the generalisability (external validity) of the study results                                                                                                                                        | 10-11  |
| <b>Other information</b> |     |                                                                                                                                                                                                              |        |
| Funding                  | 22  | Give the source of funding and the role of the funders for the present study and, if applicable, for the original study on which the present article is based                                                | 13     |

\*Give information separately for cases and controls in case-control studies and, if applicable, for exposed and unexposed groups in cohort and cross-sectional studies.

**Note:** An Explanation and Elaboration article discusses each checklist item and gives methodological background and published examples of transparent reporting. The STROBE checklist is best used in conjunction with this article (freely available on the Web sites of PLoS Medicine at <http://www.plosmedicine.org/>, Annals of Internal Medicine at <http://www.annals.org/>, and Epidemiology at <http://www.epidem.com/>). Information on the STROBE Initiative is available at [www.strobe-statement.org](http://www.strobe-statement.org).
